# Supplementary material for: Systematic immunohistochemical screening for mismatch repair and ERCC1 gene expression from colorectal cancers in China: Clinicopathological characteristics and effects on survival
Source: PLoS One. 2017 Aug 2;12(8):e0181615. doi: 10.1371/journal.pone.0181615 (PMC5540538; doi:10.1371/journal.pone.0181615)
Supplement: S1 Data — (XLSX) [file pone.0181615.s001.xlsx]

## Sheet: Sheet1
部位	分化	T	N	M	MLH1	MSH2	MSH6	PMS2	ER	Ki67	ERCC1
4	2	4	5/18	0	1	1	1	1	0
8	2	3	3/11	2	1	1	1	1	0		0
2	2	3	0/28	0	1	1	0	1	0
8	5	4	4/9	0	1	0	1	0	0	0	0
2	2	3	2/15	0	1	1	1	1	0		0
7	2	3	6/10	0	0	0	1	1	0		0
5	2	3	1c	2	1	1	1	1	0	70	0
8	2	3	6/10	0	1	1	1	0	0		0
8	2	2	3/18	0	0	1	1	0	0
8	2	4	1/7	1	1	1	1	1	0	0	1
2	2	1	0	2	1	1	1	1	0	60	1
7	2	4	0/7	0	1	1	1	1	0	70	1
8	2	3	0/3	0	1	1	1	0	0	20	0
3	2	3	0/13	0	0	1	1	0	0		0
7	2	3	0/9	0	0	1	1	1	0
8	2	4	0/9	0	0	0	0	0	0	0	0
7	1	4	2/32	0	1	1	1	1	0	0	1
1	2	4	1/21	0	1	1	1	1	0		1
8	1	3	0/2	2	0	0	1	0	0	70	0
8	2	3	0/4	0	1	1	1	1	0	90	0
8	2	2	0/22	0	0	1	0	1	0		1
8	4	3	3/4	2	0	1	0	0	0	5	1
8	2	4	6/12	0	0	1	1	0	0	40	0
3	2	3	1/12	1	0	1	1	0	1	40	0
7	2	1	0/6	0	0	0	1	0	1	70	0
8	2	2	2/7	0	0	0	1	0	0	30	0
7	2	2	0/22	0	0	0	1	0	0	70	0
8	2	2	0/11	0	1	1	0	1	0	50	1
8	2	4	0/8	0	1	1	1	1	0	1	1
7	2	4	0/9	1b	1	1	1	1	1	90	1
8	2	4	0/12	0	1	1	0	1	0	60	1
8	2	2	3/21	0	1	1	0	1	0	80	0
8	2	4	0/5	0	1	1	1	1	0	30	0
6	2	1	0	0	1	0	0	1	0	50	0
8	2	4	0/4	1b	1	1	1	1	0	30	1
8	2	4	3/11	1b	1	1	1	1	0	70	1
1	1	4	0/17	1a	0	1	0	1	0	80	1
7	2	4	2/9	0	1	1	0	1	0	80	1
2	1	5	0/32	0	0	0	0	0	0	80	0
3	2	3	2/25	0	1	1	0	1	0	85	0
8	0	4	0/18	0	0	0	0	0	0	20	0
8	2	4	0	0	0	0	0	0	0	60	0
6	2	5	2/10	0	1	1	0	1	0	80	1
4	2	4	0/18	0	0	0	0	0	0	70	0
7	2	3	0	1a	1	1	1	1	0	60	1
8	2	1	0/10	0	1	1	1	1	0	70	1
8	2	3	0/11	0	1	1	1	1	0	40	1
7	2	3	0/4	0	1	1	0	1	0	80	0
7	1	3	0/20	0	1	0	0	1	0	50	1
8	2	3	0/20	0	1	1	1	1	0	90	1
7	2	5	2/15	0	1	1	1	1	0	80	1
3	2	1	0/18	0	1	1	1	1	0	10	1
8	2	1	0/3	0	1	1	1	1	0	10	1
8	1	4	10/13	0	1	1	1	1	0	90	1
4	2	3	0/15	0	0	1	1	1	0	50	1
8	2	4	0/14	0	1	0	0	1	0	70	1
8	2	4	2/14	0	1	1	1	1	0	70	1
7	2	3	0/13	0	1	1	1	1	0	60	1
7	4	3	4/32	0	1	1	1	1	0	70	1
8	2	4	3/5	0	1	1	1	1	0	80	1
8	2	2	0/5	0	1	1	1	1	0	90	1
1	2	3	0/27	0	1	1	1	1	0	90	1
7	2	5	0/13	0	1	1	1	1	1	10	1
8	2	3	3/9	1a	1	1	1	1	0	80	1
7	2	1	0/5	0	1	1	1	1	0	90	1
8	4	3	22/41	0	1	1	1	1	1	70	1
6	2	3	3/8	0	1	1	1	1	1	90	1
8	2	3	0/7	1a	1	1	1	1	0	50	1
7	2	3	0/9	1b	1	1	1	1	0	90	1
8	2	2	0/7	0	1	1	1	1	0	80	1
7	2	3	0/19	0	1	1	1	1	0	80	1
8	2	2	0/17	0	1	1	1	1	0	80	1
8	2	3	1/12	0	1	1	1	1	0	50	0
8	2	4	0/2	0	1	1	1	1	0	15	1
8	2	3	1/18	1b	1	1	1	1	0	80	1
7	2	5	0	1b	1	1	1	1	0	50	1
7	2	3	10/13	1b	1	1	1	1	0	90	1
8	1	2	5/18	1b	1	1	1	1	0	50	1
4	2	3	0/21	0	1	1	1	1	0	80	1
8	2	2	0/23	0	1	1	1	1	0	70	1
8	2	3	3/8	0	1	1	1	1	0	50	1
8	2	4	0/5	0	1	1	1	1	0	70	0
8	2	3	0/11	0	1	1	1	1	0	60	1
7	2	3	0/10	0	1	1	1	1	0	50	0
8	2	3	0/13	0	1	1	1	1	0	60	1
8	2	3	0/18	1a	1	1	1	1	0	70	1
8	2	5	0/14	0	1	1	0	1	0	60	0
7	2	4	1/7	0	1	1	1	1	0	60	1
7	2	2	0/8	0	1	1	1	1	0	80	1
8	2	3	0/8	0	1	1	1	1	0	40	1
4	2	3	0/2	0	0	1	1	0	0	60	1
8	2	4	1c	0	1	1	0	1	0		1
6	5	5	10/16	1b	1	0	0	1	0	70	1
4	2	3	0/12	0	1	1	1	1	0	80	1
1	2	3	0/13	0	1	1	1	1	0	1	1
8	2	5	0/9	1b	1	1	0	1	0	60	1
8	2	2	0/1	0	1	1	1	1	0	20	1
8	2	4	0/12	0	1	1	1	1	0	40	1
3	2	3	0/22	0	1	1	0	1	0	50	1
7	2	3	0/11	0	1	1	1	1	0	80	1
7	2	3	3/6	1a	1	1	1	1	0	70	1
4	2	4	0/1	1b	1	1	1	1	0	40	1
8	2	3	4/14	1a	1	1	1	1	0	70	0
8	2	4	0/17	1b	0	1	0	1	0	40	0
2	2	4	0/19	0	0	1	1	1	0	40	1
7	2	1	3/24	1b	0	1	0	0	0	20	0
2	2	1	2/23	0	1	1	1	1	0	80	1
7	2	1	1/15	1a	1	1	0	1	0	80	0
5	2	2	0/18	0	1	1	0	1	0	10	0
2	4	3	0/10	0	1	1	0	1	0	30	0
2	4	3	0/31	0	1	1	0	1	0	40	0
7	2	3	0/4	0	1	1	0	1	0	70	0
8	2	4	2/16	0	1	1	1	1	0	80	1
7	2	3	3/8	0	1	1	1	1	0	60	1
8	2	3	1/3	1b	1	1	1	1	0	90	1
4	2	3	3/15	0	1	1	1	1	0	70	1
8	2	4	0/17	0	1	1	1	1	0	70	1
7	2	4	2/24	0	1	1	1	1	0	40	1
1	2	1	0/7	0	1	1	0	1	0	80	1
7	2	2	0/4	0	1	1	1	1	0	60	1
6	2	3	0/11	0	1	1	1	1	0	60	1
4	2	3	0/42	0	0	1	1	0	0	60	0
7	2	3	0/11	0	1	1	0	2	0	50	1
7	2	3	0/30	0	1	1	1	1	0	50	1
7	2	3	0	1b	1	1	1	1	0	80	1
2	2	3	0/19	0	1	1	0	1	0	70	1
8	2	4	0/9	0	1	1	1	1	0	80	1
8	2	3	0/5	0	1	1	1	1	0	80	1
8	2	4	0/16	0	0	1	0	0	0	70	0
2	2	3	4/11	1b	1	1	1	1	0	50	0
7	2	3	0/1	1a	1	0	1	1	0	70	0
7	2	3	0/1	0	1	1	1	1	0	5	1
7	4	4	10/12	1b	1	1	1	1	0	40	1
8	2	4	0/3	0	1	1	1	1	0	20	1
8	2	5	0/14	1a	1	1	1	1	0	70	0
7	2	2	0/6	0	1	1	1	1	0	50	1
8	2	4	7/8	1a	1	1	1	1	1	60	1
1	2	4	0/22	0	1	1	1	1	0	60	1
8	2	4	2/14	0	1	1	1	1	0	60	1
2	2	3	1/34	0	1	1	0	1	0	80	1
5	2	3	0/11	0	1	1	1	1	0	70	1
8	2	4	0/7	0	1	1	1	1	0	60	1
7	2	4	0/7	1a	1	1	1	1	0	40	1
8	2	4	1/7	1a	1	1	1	1	0	40	1
7	2	1	0/5	0	1	1	0	1	0	50	1
4	4	3	0/21	0	1	1	0	1	0	80	1
7	2	3	0/35	0	0	1	1	0	0	60	1
8	2	4	4/12	1a	1	1	1	1	0	60	1
8	2	2	0/23	0	1	1	0	1	0	20	1
7	2	3	0/10	0	1	1	1	1	0	80	0
8	2	2	0/15	0	1	1	1	1	0	80	1
7	2	3	0/23	0	1	1	1	1	0	70	1
8	4	4	0/14	0	1	1	1	1	0	70	1
7	2	4	14/20	0	1	1	1	1	0	80	0
3	2	4	1/3	1a	1	1	1	1	0	20	1
8	2	4	0/12	0	1	1	1	1	0	60	0
8	1	4	2/5	0	1	1	1	1	0	60	0
8	2	4	0/25	0	1	1	1	1	0	60	0
2	4	3	3/15	1b	1	1	1	1	0	80	1
7	2	3	0/6	0	1	1	1	1	0	80	1
7	2	3	0/9	0	1	1	0	1	1	50	0
8	4	3	0/4	0	1	1	0	1	0	5	0
8	2	4	3/18	1b	1	1	1	1	0	60	0
8	2	3	0/1	0	1	1	1	1	0	50	0
7	2	3	0/17	0	1	1	1	1	0	80	0
1	2	5	1/21	0	0	1	1	1	0	60	0
7	2	3	0/16	0	1	1	1	1	0	30	0
8	2	4	0/15	0	1	1	1	1	0	90	1
2	3	3	0/19	0	1	1	1	1	0	70	1
7	2	3	1/10	0	1	1	1	1	0	50	1
8	2	4	0/5	0	1	1	1	1	0	60	1
7	2	4	1/2	1b	1	1	1	1	0	30	1
8	2	4	0/5	0	1	1	1	1	0	40	1
8	2	3	1/3	0	1	1	1	1	1	80	1
8	2	3	0/13	0	1	1	1	1	0	70	1
7	2	3	0/16	0	1	1	1	1	0	90	1
1	1	4	0/20	0	0	1	1	0	0	60	1
8	2	3	0/3	0	1	1	1	1	0	60	0
8	2	3	0/5	0	1	1	1	1	0	60	1
7	2	3	0/7	1a	1	1	1	1	0	30	1
7	2	3	4/14	0	1	1	1	1	0	70	0
8	2	2	0/12	0	1	1	1	1	0	60	1
4	4	3	0/18	0	0	1	1	0	0	20	0
3	4	4	7/25	1b	1	1	1	1	0	30	0
7	2	4	4/14	0	1	1	1	1	0	80	1
8	1	4	1/6	0	1	1	1	1	1	70	1
8	2	2	0/10	0	1	1	1	1	0	40	0
4	1	3	1/21	0	1	1	1	1	1	60	1
4	2	3	0/19	0	1	1	1	1	0	70	1
8	2	3	0/12	0	1	1	1	1	0	20	0
8	4	2	1/8	0	1	1	1	1	0	40	1
7	2	3	7/10	1b	1	1	1	1	0	30	0
7	2	4	2/16	1b	1	1	1	1	0	80	1
8	2	2	0/9	0	1	1	1	1	0	5	1
1	1	4	3/3	1b	1	1	1	1	1	90	1
7	1	4	0/8	0	1	1	1	1	0	90	1
8	2	2	0	0	1	1	1	1	0	80	1
8	2	3	0/7	1a	1	1	1	1	0	60	1
8	2	4	0/2	0	1	1	1	1	0	70	0
8	2	4	0/8	1b	1	1	1	1	1	40	1
4	2	3	5/6	1b	1	1	1	1	0	70	1
2	2	3	0/24	0	1	1	1	1	0	80	1
8	2	4	0/14	0	1	1	1	1	0	60	1
1	2	3	0/19	0	1	1	1	1	1	90	0
8	2	3	0/14	0	1	1	1	1	0	90	1
7	2	2	0/2	0	1	1	1	1	0	90	1
8	2	3	0/4	1b	1	1	1	1	0	60	1
8	2	4	0/2	0	1	1	1	1	1	5	1
8	2	1	0/4	0	1	1	1	1	0	70	1
7	2	3	0/24	0	1	1	1	1	1	80	1
3	2	3	0/29	0	1	1	1	1	1	70	1
6	2	3	0/7	1a	1	1	1	1	0	70	1
8	1	2	2/8	0	1	1	1	1	0	90	1
1	2	3	0/19	0	1	1	1	1	0	80	1
8	2	3	0/4	0	1	1	1	1	1	70	1
8	2	2	1/13	0	1	1	1	1	0	60	1
8	2	3	0/14	0	1	1	1	1	0	20	0
8	2	2	7/15	1a	1	1	1	1	0	80	1
7	2	1	0/2	0	1	1	1	1	1	80	1
8	2	4	0	1b	1	1	1	1	0	40	1
7	1	3	3/4	1b	1	1	1	1	0	60	1
4	2	3	0/15	0	1	1	1	1	0	90	1
3	2	3	2/20	0	1	1	1	1	0	80	1
7	2	4	7/9	1a	1	1	1	1	0	40	1
8	1	4	1/19	0	1	1	1	1	0	90	1
8	2	4	1/18	0	1	1	1	1	0	50	1
7	2	1	0/3	0	1	1	1	1	0	80	1
2	2	4	0/21	0	1	1	1	1	0	40	1
1	2	4	0/15	0	1	1	1	1	0	70	1
7	2	3	0/35	0	1	1	1	1	0	80	1
7	2	3	0/7	1a	1	1	1	1	0	80	1
2	2	3	2/24	0	0	1	1	0	1	70	1
7	2	3	1/4	0	1	1	1	1	0	60	1
8	2	3	3/21	0	1	1	1	1	0	40	1
7	2	3	2/8	0	1	1	1	1	0	90	1
8	2	2	0/19	0	1	1	1	1	0	60	1
8	2	4	3/10	0	1	1	1	1	0	70	1
8	2	5	6/18	0	1	1	1	1	0	50	1
8	4	3	0/8	0	1	1	1	1	0	70	1
1	4	3	0/16	0	0	1	1	1	0	90	1
8	2	5	1/15	1b	1	1	1	1	0	30	1
8	2	4	8/23	0	1	1	1	1	0	60	1
4	2	4	0/27	1b	1	1	1	1	0	80	1
8	2	4	0/18	0	1	1	1	1	0	70	1
8	2	4	0/18	0	1	1	1	1	0	70	1
7	2	3	4/13	0	1	1	1	1	0	60	0
3	2	3	0/12	0	1	1	1	1	0	70	1
7	2	3	4/34	1a	1	1	1	1	0	60	1
8	2	1	0/13	0	1	1	1	1	0	60	1
8	2	4	0/5	0	1	1	1	1	0	90	1
7	2	3	4/10	0	1	1	1	1	0	70	1
2	2	3	0/24	0	1	1	1	1	0	40	0
7	2	3	1/9	0	1	1	1	1	0	30	1
8	1	3	0/5	0	0	1	1	1	0	60	1
7	2	4	0/4	1a	1	1	1	1	0	30	1
7	2	3	3/12	1a	1	1	1	1	0	40	0
8	2	4	1/7	0	1	1	1	1	0	90	1
8	1	4	2/7	0	1	1	1	1	0	5	1
8	2	4	1/6	0	1	1	1	1	0	50	0
7	2	3	3/14	0	1	1	1	1	0	80	1
2	2	3	0/15	0	1	1	1	1	0	70	0
2	2	3	2/16	0	1	1	1	1	0	60	1
8	2	4	0/11	0	1	1	1	1	0	50	1
8	2	4	1/3	0	1	1	1	1	0	70	1
6	2	3	0/15	0	1	1	1	1	0	80	1
6	2	3	0/5	0	1	1	1	1	0	80	1
2	2	3	0/41	0	0	1	1	0	0	80	1
7	2	5	0/7	1b	1	1	1	1	0	50	1
7	2	3	1/11	0	1	1	1	1	0	50	1
2	2	3	0/23	0	1	1	0	1	0	60	1
7	2	3	3/12	1a	1	1	1	1	0	90	1
8	2	4	1c	1b	1	1	1	1	0	60	1
2	2	4	1/11	0	1	1	1	1	0	70	1
7	2	4	0/1	0	1	1	1	1	0	40	1
7	2	3	0/14	1a	1	1	1	1	0	40	1
7	2	5	0/13	0	1	1	1	1	0	80	1
8	2	4	0/14	0	1	1	1	1	0	50	1
8	2	4	0/5	0	1	1	1	1	0	15	1
7	2	3	1/9	0	1	1	1	1	0	30	1
3	2	4	0/28	0	0	1	1	0	0	60	1
7	4	3	6/15	0	1	1	1	1	0	30	1
8	2	4	0/12	0	1	1	1	1	0	60	1
1	2	3	4/29	0	1	1	0	1	0	60	1
8	2	4	0/2	0	1	1	1	1	0	3	1
8	2	2	0/7	0	1	1	1	1	0	50	1
8	2	4	0/5	0	1	1	1	1	0	50	1
5	2	3	0/13	0	0	1	1	0	0	20	1
3	2	3	0/21	0	1	1	1	1	0	70	1
8	1	1	0/9	0	1	1	1	1	0	60	1
8	2	4	2/9	1a	1	1	1	1	0	70	0
6	2	3	1/23	0	1	1	1	1	0	60	1
4	2	3	2/22	0	1	1	0	1	0	70	1
8	2	4	3/25	0	1	1	1	1	0	20	1
7	2	2	0/9	0	1	1	1	1	0	30	0
7	4	5	3/5	1b	1	1	1	1	0	20	0
7	2	4	0/2	1b	1	1	1	1	0	70	1
8	2	4	3/8	0	1	1	1	1	1	60	1
7	2	5	2/10	1b	1	1	1	1	0	50	1
7	2	4	3/16	0	1	1	1	1	0	70	1
8	2	5	0/3	0	1	1	1	1	0	40	1
2	2	2	0/13	0	1	1	1	1	0	40	1
7	2	2	0/10	0	1	1	1	1	0	60	1
8	2	3	0/11	0	1	1	1	1	0	5	0
8	2	2	0/14	0	1	1	1	1	0	5	1
2	2	3	1/22	0	1	1	1	1	0	80	1
7	2	4	1/10	0	1	1	1	1	0	60	1
4	2	5	0/6	0	1	1	1	1	0	40	1
7	2	3	0/16	0	1	1	1	1	0	80	1
7	2	3	1/19	0	1	1	1	1	0	70	0
8	2	2	1/11	0	1	1	1	1	0	60	1
7	1	3	1/12	0	1	1	1	1	0	70	1
7	1	5	21/21	1b	1	1	1	1	0	60	1
7	2	3	2/14	0	1	1	1	1	0	50	1
8	2	4	0/4	0	1	1	1	1	0	60	0
7	2	3	2/4	0	1	1	1	1	0	60	1
7	2	3	4/11	1a	1	1	1	1	0	60	1
8	2	2	0/4	0	1	1	1	1	0	40	1
2	2	3	1/44	0	1	1	1	1	0	60	1
7	2	3	0/11	0	0	1	1	0	0	80	1
7	2	3	0/12	0	1	1	1	1	0	50	1
2	2	3	1/24	0	0	1	1	0	0	90	1
1	2	3	0/18	0	1	1	1	1	0	60	1
3	2	3	0/9	0	1	1	1	1	0	50	1
7	2	4	0/11	0	1	1	1	1	0	80	1
7	2	3	0/2	0	1	1	1	1	0	70	1
7	2	4	0/10	1a	1	1	1	1	0	50	1
3	1	3	3/20	0	1	1	1	1	0	80	1
8	2	4	0/18	0	0	1	1	1	0	20	0
8	2	4	0/2	0	1	1	1	1	0	5	1
0	2	3	4/18	0	1	1	1	1	0	70	1
2	2	3	0/31	0	0	1	1	0	0	90	1
8	2	2	0/10	0	1	1	1	1	0	80	1
2	2	3	0/2	0	1	1	1	1	0	40	1
3	4	4	0/21	0	1	1	1	1	0	70	1
3	2	3	7/16	0	1	1	1	1	0	40	1
1	2	3	0/17	0	1	1	1	1	0	80	1
8	2	4	0/8	0	1	1	1	1	0	10	1
7	2	3	0/7	0	1	1	1	1	0	80	1
2	2	3	0/11	0	1	1	1	1	0	30	1
7	2	4	0/14	0	1	1	1	1	0	70	1
8	2	4	6/15	0	1	1	1	1	0	80	1
8	2	4	0/19	0	1	1	1	1	0	70	1
3	2	3	0/8	0	1	1	1	1	0	70	1
7	2	2	0/1	1b	1	1	1	1	0	40	1
2	2	3	0/21	0	1	1	1	1	0	70	1
2	2	3	1/17	0	0	1	1	0	0	80	1
8	2	4	3/16	0	1	1	1	1	0	40	1
8	2	4	0/9	0	1	1	1	1	0	90	1
8	2	4	0/15	0	1	1	1	1	0	60	1
8	5	4	9/10	1a	1	1	1	1	0	90	1
8	2	2	0/2	0	1	1	1	1	0	60	1
8	2	4	0/9	0	1	1	1	1	0	50	1
7	2	3	7/25	0	1	1	1	1	0	40	1
2	2	1	0/8	0	1	1	1	1	0	60	1
8	2	4	0/24	0	1	1	1	1	0	40	1
8	2	4	0/5	1a	1	1	1	1	0	50	0
8	2	4	1c	0	1	1	1	1	0	5	1
3	4	3	0/52	0	1	1	1	1	0	50	1
8	2	4	0/5	0	1	1	1	1	0	60	1
8	2	1	0	0	1	1	1	1	0	30	1
7	2	4	11/12	1b	1	1	1	1	0	50	1
2	2	3	0/10	0	1	0	0	1	0	40	0
1	2	3	0/38	0	1	1	1	1	0	75	1
6	2	3	0/28	0	1	1	1	1	0	50	1
7	2	4	1c	0	1	1	1	1	0	60	1
1	2	5	0/15	0	1	1	1	1	0	80	0
7	2	3	0/20	0	1	1	1	1	0	10	1
7	2	3	0/23	0	1	1	1	1	0	50	0
8	2	3	0/5	0	1	1	1	1	0	20	1
8	2	4	0/6	0	1	1	1	1	0	1	1
7	2	3	1/15	0	1	1	1	1	0	10	1
7	4	4	5/15	0	1	1	1	1	0	30	1
4	2	4	4/28	0	1	1	1	1	0	40	1
8	2	1	0/3	0	1	1	1	1	0	80	1
8	2	1	0/22	0	1	1	1	1	0	30	0
7	2	3	0/19	0	1	1	1	1	0	40	1
2	2	3	0/15	0	1	1	1	1	0	20	0
8	2	3	0/9	0	1	1	1	1	1	40	1
8	2	4	0/11	0	1	1	1	1	0	50	1
7	2	3	0/7	0	1	1	1	1	0	30	1
7	2	3	1/15	0	1	1	1	1	0	30	0
8	2	4	5/7	0	1	1	1	1	0	10	1
8	2	2	0	0	1	1	1	1	0	1	1
8	2	5	0	0	1	1	1	1	0	40	1
8	2	2	0/12	0	1	1	1	1	1	80	1
8	2	4	1/12	1a	1	1	1	1	0	30	1
8	1	4	2/10	1b	1	1	1	1	0	50	1
7	2	2	0/11	0	1	1	1	1	0	60	0
1	4	4	1/4	1b	1	1	1	1	0	60	1
7	2	4	3/8	1b	1	1	1	1	0	70	1
8	2	4	0/23	0	0	1	1	1	0	50	0
7	2	3	0/11	0	1	1	1	1	0	80	0
2	2	3	0/17	0	1	1	1	1	0	60	1
8	2	2	0/10	0	2	2	2	2	0	90	1
7	2	3	3/9	1a	1	1	1	1	0	80	1
4	2	3	0/20	0	1	1	1	1	0	80	1
8	2	4	1/10	0	1	1	1	1	0	40	1
8	2	3	0/15	0	1	1	1	1	0	70	1
7	5	3	2/5	0	1	1	1	1	0	60	1
8	3	2	0/4	0	1	1	1	1	0	1	1
8	2	2	0/3	0	1	1	1	1	0	40	1
8	2	3	3/14	0	1	1	1	1	0	50	1
8	2	5	0/3	0	1	1	1	1	0	1	1
6	2	4	4/19	0	1	1	1	1	0	60	1
6	2	4	0/29	0	1	1	1	1	0	60	1
1	2	3	0/30	0	1	1	1	1	0	70	0
8	2	4	4/10	0	1	1	1	1	0	50	1
8	2	4	0/7	0	1	1	1	1	0	85	1
7	2	3	2/11	0	1	1	1	1	0	70	1
6	2	3	1/14	0	1	1	1	1	0	90	0
8	1	2	0/3	0	1	1	1	1	0	2	1
8	2	4	0/26	0	1	1	1	1	0	30	0
7	2	3	0/26	0	1	1	1	1	0	60	0
7	2	5	1/6	1a	1	1	1	1	0	40	0
1	1	3	0/16	0	1	1	1	1	0	70	1
8	2	1	0	0	1	1	1	1	0	90	0
7	2	4	0/11	0	1	1	1	1	0	60	1
8	3	3	0/10	0	1	1	1	1	0	85	1
8	2	2	0/8	0	1	1	1	1	0	80	1
7	2	4	1c	1a	1	1	1	1	0	70	1
7	2	3	0/9	0	1	1	1	1	0	40	1
8	2	4	0/7	0	1	1	1	1	0	20	1
7	2	3	1/29	0	1	1	1	1	0	60	1
8	2	4	5/18	0	1	1	1	1	0	80	1
8	2	4	7/20	0	1	1	1	1	0	50	1
7	2	3	0	1b	1	1	1	1	0	30	1
8	2	3	0/7	0	1	1	1	1	0	70	1
1	2	3	0/31	0	1	1	1	1	0	70	1
1	2	3	0/21	0	0	1	1	1	0	70	0
2	2	3	4/12	1a	1	1	1	1	0	40	0
4	2	3	0/17	0	1	1	1	1	0	60	0
6	2	4	1/14	0	1	1	1	1	0	50	1
7	6	3	8/13	1a	1	1	1	1	0	70	1
7	2	3	0/6	0	1	1	1	1	0	70	1
8	2	4	1c	0	1	1	1	1	0	30	1
1	2	4	0/45	0	1	1	1	1	0	80	1
7	2	5	0/17	0	1	1	1	1	0	40	0
7	2	3	0/24	0	0	1	1	1	0	70	0
7	2	3	1/7	0	1	1	1	1	0	30	1
7	2	3	2/9	0	1	1	1	1	0	90	0
1	2	2	0/20	0	0	1	1	0	0	60	0
6	2	3	0/19	0	1	1	1	1	0	70	1
8	2	4	0/3	0	1	1	1	1	0	80	1
4	2	3	0/21	0	1	0	1	1	0	70	1
7	2	4	1/14	0	1	1	1	1	0	10	0
7	4	3	0/10	0	1	1	1	1	0	80	0
8	2	4	1/5	1a	1	1	1	1	0	40	1
8	2	4	0/11	0	1	1	1	1	0	10	0
7	2	5	0/7	1a	1	1	1	1	0	60	1
1	1	4	1c	0	1	1	1	1	0	70	1
8	1	2	0/15	0	1	1	1	1	0	70	1
5	2	3	0/19	0	1	0	0	1	0	70	1
1	2	3	0/22	0	1	1	1	1	0	30	1
3	2	5	0/4	0	0	1	1	0	0	70	1
4	2	3	0/12	1a	1	1	1	1	0	20	1
7	2	3	6/15	1b	1	1	1	1	0	50	1
7	2	3	0/4	0	1	1	1	1	0	50	1
8	2	2	2/7	0	1	1	1	1	0	40	1
8	2	4	0/2	0	1	1	1	1	0	20	1
7	4	4	4/4	0	1	1	1	1	0	30	0
8	2	4	2/6	0	1	1	1	1	0	40	1
8	2	3	0/14	0	1	1	1	1	0	50	1
1	1	3	1/41	0	1	1	1	1	0	60	1
7	2	3	1/11	0	1	1	1	1	0	50	1
8	2	4	1/17	0	1	1	1	1	0	40	0
8	2	4	1/7	0	1	1	1	1	0	70	1
8	2	4	4/7	1a	1	1	1	1	0	80	0
7	2	3	0/10	0	1	1	1	1	0	70	1
7	2	3	2/24	1a	1	1	1	1	0	40	1
8	2	3	0/2	0	1	1	1	1	0	50	1
7	2	3	0/4	0	1	1	1	1	0	80	1
2	1	4	0/4	0	1	1	1	1	0	90	1
7	2	3	2/13	0	1	1	1	1	0	70	1
2	2	2	0/14	0	1	1	1	1	0	60	0
8	2	4	1/4	0	1	1	1	1	0	5	1
7	4	4	18/18	0	1	1	1	1	0	40	1
8	2	4	1/13	0	1	1	1	1	0	50	0
8	2	3	0/4	0	1	1	1	1	0	10	1
7	2	4	5/9	1b	1	1	1	1	0	20	0
4	2	4	1/15	1b	1	1	1	1	0	50	0
8	2	4	0/12	0	1	1	1	1	0	1	1
3	2	2	0/20	0	1	1	1	1	0	50	0
4	2	4	1c	1b	1	1	1	1	0	15	1
8	2	2	0/27	0	0	1	1	0	0	80	0
7	2	3	0/13	0	1	1	1	1	0	70	1
8	2	4	0/10	0	1	1	1	1	0	30	1
8	2	4	0/6	0	1	1	1	1	0	80	1
8	1	4	5/9	0	1	1	1	1	0	70	1
1	2	3	1/40	0	1	1	1	1	0	30	1
2	2	3	0/20	0	1	1	1	1	0	60	0
7	2	3	3/10	0	1	1	1	1	0	40	0
8	2	2	1/10	0	1	1	1	1	0	60	1
8	2	3	1/18	0	1	1	1	1	0	25	1
2	2	2	0/22	0	0	1	1	1	0	50	1
7	2	3	3/5	1b	1	1	1	1	0	60	1
8	2	4	0/10	0	1	1	1	1	0	50	1
7	2	4	0/12	0	1	1	1	1	0	30	1
7	2	3	0/12	0	1	1	1	1	0	30	1
8	1	4	1c	0	1	1	1	1	0	1	1
7	2	2	0/9	0	1	1	1	1	0	50	1
2	2	5	0/4	1b	1	1	1	1	0	20	1
7	2	3	0/13	0	1	1	1	1	0	30	1
8	2	4	1/14	0	1	1	1	1	0	30	1
7	2	3	0/22	0	1	1	1	1	0	30	1
8	2	2	0/16	0	1	1	1	1	0	50	1
2	2	3	2/13	1a	1	1	1	1	0	60	1
7	2	2	0/18	0	0	1	0	0	0	30	1
1	2	3	3/11	0	1	1	1	1	0	30	1
8	2	4	0/9	0	1	1	1	1	0	40	1
8	2	3	0/9	0	1	1	1	1	0	30	1
7	2	4	1/9	0	1	1	1	1	0	60	1
1	2	3	4/8	1b	1	1	1	1	0	70	0
6	2	3	2/16	0	1	1	1	1	0	60	1
6	2	3	4/9	0	1	1	1	1	0	50	0
8	2	3	0/9	0	1	1	1	1	0	5	1
8	2	4	1/9	0	1	1	1	1	0	30	1
8	2	4	0/5	0	1	1	1	1	0	60	1
7	2	3	0/1	1b	1	1	1	1	0	2	1
7	4	3	6/12	0	1	1	1	1	0	70	1
8	2	4	0/9	0	1	1	1	1	0	50	0
8	1	4	1c	1a	1	1	1	1	0	30	1
4	2	3	0/25	0	0	1	1	0	0	30	1
1	2	3	1/11	0	0	1	1	0	0	50	1
2	1	5	3/6	1b	1	1	1	1	0	80	1
7	2	3	2/12	0	1	1	1	1	0	20	1
7	2	3	1/23	0	1	1	1	1	0	30	1
7	2	3	0/10	1a	1	1	1	1	0	70	1
8	2	4	1/9	0	1	1	1	1	0	60	1
7	1	3	0/29	0	1	1	0	1	0	30	1
7	2	3	0/6	0	1	1	1	1	0	30	1
4	2	4	0/11	0	1	0	0	1	0	60	1
6	2	3	0/17	0	1	1	1	1	0	30	1
7	2	3	1/12	0	1	1	1	1	0	20	1
8	2	4	0/24	0	1	1	1	1	0	40	1
2	3	2	0/14	0	1	1	1	1	0	20	1
8	2	4	0/5	1a	1	1	1	1	0	80	1
7	2	4	2/7	0	1	1	1	1	0	30	1
6	4	4	0/11	0	1	1	1	1	0	20	1
8	2	4	0/20	0	1	1	1	1	0	50	0
8	2	4	2/7	0	1	1	1	1	0	15	0
2	2	4	0/30	0	1	0	0	1	0	50	1
8	2	4	5/5	0	1	1	1	1	0	40	1
8	2	4	2/5	0	1	1	1	1	0	40	0
3	2	4	0/6	1a	1	1	1	1	0	70	1
8	2	2	0/12	0	1	1	1	1	0	60	1
4	2	3	0/12	1b	1	1	1	1	0	80	1
8	2	2	0/5	0	1	1	1	1	0	60	1
7	2	3	0	1a	1	1	1	1	0	40	1
1	2	2	0/14	0	1	1	1	1	0	70	1
2	2	3	0/36	0	1	1	1	1	0	40	1
8	2	4	1/5	0	1	1	1	1	0	70	1
7	2	3	0/2	1b	1	1	1	1	0	70	1
8	2	3	0/12	1a	1	1	1	1	0	30	0
4	2	5	1a	0	1	1	1	1	0	60	1
8	2	4	1/1	0	1	1	1	1	0	70	1
4	2	3	0/26	0	1	1	1	1	0	30	1
4	2	3	0/32	0	1	1	1	1	0	60	1
4	2	3	0/4	0	1	1	1	1	0	60	0
7	2	3	1c	1a	1	1	1	1	0	40	1
8	2	5	5/12	1a	1	1	1	1	0	30	0
8	2	2	0/14	0	1	1	1	1	0	40	1
7	2	3	9/10	0	1	1	1	1	0	10	1
8	2	1	1/7	0	1	1	1	1	0	40	1
8	2	2	0/12	0	1	1	1	1	0	60	1
8	2	4	0/10	0	1	1	1	1	0	30	0
8	2	3	0/8	1a	1	1	1	1	0	80	1
8	2	4	4/11	1a	1	1	1	1	0	60	1
8	2	2	0/5	0	1	1	1	1	0	80	1
8	2	4	0/9	0	1	1	1	1	0	5	1
7	2	2	2/8	0	1	1	1	1	0	40	1
4	2	5	4/29	1b	1	1	1	1	0	30	1
7	2	3	6/22	0	1	1	1	1	0	60	1
7	2	4	7/8	0	1	1	1	1	0	40	1
8	2	4	0/12	0	1	1	1	1	0	3	1
8	2	2	0/24	0	1	1	1	1	0	20	1
8	2	2	0/6	0	1	1	1	1	0	50	1
2	2	3	5/7	0	1	1	1	1	0	50	1
8	2	2	0/12	0	1	1	1	1	0	50	0
4	2	3	1c	0	1	1	1	1	0	70	0
7	1	4	14/16	1b	1	1	1	1	0	20	1
8	2	2	0/6	0	1	1	1	1	0	60	1
7	2	2	0	0	1	1	1	1	0	60	1
8	2	3	0/16	0	1	1	1	1	0	60	1
8	2	2	0/6	0	1	1	1	1	0	30	1
8	2	4	4/10	0	1	1	1	1	0	60	1
8	2	4	0/8	0	1	1	1	1	0	70	0
7	2	3	1/10	0	1	1	1	1	0	40	1
7	2	3	0/7	0	1	1	1	1	0	30	1
7	1	3	10/17	0	1	1	1	1	0	60	1
8	2	2	1/10	0	1	1	1	1	0	50	1
6	3	2	0/11	0	1	1	1	1	0	30	1
8	2	2	0/13	0	1	1	1	1	0	80	0
7	2	3	0/15	1a	1	1	1	1	0	40	1
7	2	3	0/8	0	1	1	1	1	0	40	0
8	2	3	1/15	0	1	1	1	1	0	70	1
3	2	3	2/44	0	1	1	1	1	0	60	1
2	2	3	1/10	0	0	1	1	0	0	30	1
7	2	1	0/14	0	1	1	1	1	0	60	1
2	2	3	0/19	0	1	1	1	1	0	30	0
7	2	5	1/19	0	1	0	1	1	0	40	1
7	2	3	3/11	0	1	1	1	1	0	80	1
4	2	5	1c	1a	1	1	1	1	0	70	1
3	2	3	0/45	0	1	1	1	1	0	50	1
8	2	4	0/14	1a	1	1	1	1	0	80	1
8	2	2	0/16	0	1	0	0	1	0	70	1
8	2	3	1c	0	1	1	1	1	0	20	1
8	2	4	0/9	0	1	1	1	1	0	40	1
7	2	3	4/9	0	1	1	1	1	0	40	1
8	2	2	1/2	0	1	1	1	1	0	5	1
7	2	2	2/3	0	1	1	1	1	0	90	0
8	2	4	1/8	0	1	1	1	1	0	15	0
3	2	3	0/17	0	1	1	1	1	0	40	1
3	2	3	0/51	0	0	1	1	0	0	50	1
4	2	3	4/15	0	1	1	1	1	0	80	1
8	2	4	0/11	1a	1	1	1	1	0	20	1
3	2	5	3/25	1a	1	1	1	1	0	50	1
8	2	1	0	0	1	1	1	1	0	80	1
7	2	3	2/10	1a	1	1	1	1	0	40	1
8	2	3	1c	1a	1	1	1	1	0	20	1
8	2	4	0/6	0	1	1	1	1	0	1	1
8	2	2	0/1	0	1	1	1	1	0	80	1
7	3	1	0/11	0	1	1	1	1	0	30	1
7	2	3	3/10	0	1	1	1	1	0	70	1
8	2	4	1/13	0	1	1	1	1	0	60	0
8	2	2	0/3	0	1	1	1	1	0	1	1
3	2	3	2/23	0	1	1	1	1	0	40	1
3	2	3	0/13	1a	1	1	1	1	0	60	1
7	2	1	0/13	0	1	1	1	1	0	70	1
8	2	3	0/24	0	1	1	1	1	0	30	1
6	2	3	0	0	1	1	1	1	0	40	1
2	2	3	0/19	0	1	1	0	1	0	70	1
8	2	4	0/16	0	1	1	1	1	0	70	1
7	2	1	0	0	1	1	1	1	0	60	1
7	5	3	3/7	0	1	1	1	1	0	20	1
8	2	4	0/4	0	1	1	1	1	0	2	1
1	2	3	0/35	0	0	1	1	0	0	70	1
3	2	3	0/30	0	1	1	1	0	0	60	1
7	2	3	4/28	0	1	1	1	1	0	40	1
8	2	2	0/9	0	1	1	1	1	0	1	1
8	2	1	0/10	0	1	1	1	1	0	40	1
6	2	3	3/29	0	1	1	1	1	0	60	1
4	2	3	0/24	1a	1	1	1	1	0	80	0
8	2	4	5/11	0	1	1	1	1	0	30	0
2	2	3	0/13	0	1	1	1	1	0	70	0
7	2	3	1c	0	1	1	1	1	0	80	1
7	2	2	0/3	0	1	1	1	1	0	60	1
6	2	4	0/6	0	1	1	1	1	0	40	1
8	2	4	0/20	0	1	1	1	1	0	80	1
4	2	3	0/14	0	0	1	1	0	0	70	1
3	2	3	0/25	0	0	1	1	0	0	60	1
8	2	2	0/7	0	1	1	1	1	0	60	1
8	2	3	0/16	0	1	1	1	1	0	70	1
8	2	1	0/5	0	1	1	1	1	0	50	1
6	2	3	1c	0	1	1	1	1	0	70	1
7	2	3	0/13	0	1	1	1	1	0	50	1
1	1	3	0/15	0	1	1	1	1	0	60	0
8	2	4	1/5	0	1	1	1	1	0	2	1
8	4	5	0/4	0	1	0	0	1	0	50	1
4	2	3	0/9	0	1	1	1	1	0	40	1
2	2	3	10/34	0	1	1	1	1	0	40	0
7	2	3	0/14	0	1	1	1	1	0	60	1
7	1	3	1/1	1b	1	1	1	1	0	50	1
8	2	4	3/16	0	1	1	1	1	0	30	1
8	2	4	2/9	0	1	1	1	1	0	50	1
8	2	3	2/20	1a	1	1	1	1	0	60	1
1	2	3	0/25	0	1	1	1	1	0	50	1
2	2	5	1/25	0	1	1	1	1	0	70	1
6	1	3	1c	0	1	1	1	1	0	80	1
7	2	3	1c	0	1	1	1	1	0	70	1
7	2	3	1c	1b	1	1	1	1	0	60	1
8	2	3	1/4	0	1	1	1	1	0	50	0
4	2	3	0/7	0	1	1	1	1	0	50	1
8	2	4	1/17	0	1	1	1	1	0	70	1
7	2	4	0/15	0	1	1	1	1	0	40	1
7	2	3	1c	1a	1	1	1	1	0	70	1
7	2	4	2/16	0	1	1	1	1	0	40	1
8	2	5	0/2	0	1	1	0	1	0	80	1
7	2	5	0	0	1	1	1	1	0	40	1
8	2	4	0/29	0	1	1	1	1	0	70	1
8	2	3	0/9	0	1	1	1	1	0	20	0
3	4	4	4/28	1a	1	1	1	1	0	30	1
8	2	4	0/17	0	1	1	1	1	0	30	1
7	2	3	6/24	1a	1	1	1	1	0	60	1
8	2	4	2/8	1a	1	1	1	1	0	30	1
8	2	5	0/6	1b	1	1	1	1	0	30	1
7	2	3	5/7	0	1	1	1	1	0	60	1
7	2	3	6/16	0	1	1	1	1	0	60	1
8	2	2	0	0	1	1	1	1	0	20	1
8	2	4	1c	0	1	1	1	1	0	80	1
7	2	3	0/1	1a	1	1	1	1	0	5	1
7	1	3	4/17	0	1	1	1	1	0	20	1
6	2	3	0/11	0	1	1	1	1	0	40	1
2	2	3	2/24	0	1	1	1	1	0	30	0
8	2	4	0	0	1	1	1	1	0	40	1
7	3	1	0/1	0	1	1	1	1	0	40	1
2	2	3	2/32	0	1	1	1	1	0	70	1
8	2	4	2/7	0	1	1	1	1	0	10	1
2	2	2	0/19	0	1	1	1	1	0	50	1
1	1	3	0/37	0	0	1	1	0	0	70	0
2	2	3	8/13	1a	1	1	1	1	0	70	1
8	2	3	0/22	1a	1	1	1	1	0	40	1
4	3	1	3/17	0	1	1	1	1	0	30	1
8	2	4	0/1	1a	1	1	1	1	0	2	1
8	2	4	0/12	0	1	1	1	1	0	60	1
7	2	3	0/15	0	1	1	1	1	0	60	1
7	2	3	0/14	0	1	1	1	1	0	50	1
7	2	2	0/5	0	1	1	1	1	0	30	0
8	4	4	2/8	0	1	1	1	1	0	1	1
8	2	3	1/9	0	1	1	1	1	0	30	0
7	2	2	1c	1a	1	1	1	1	0	50	1
7	2	3	2/22	0	1	1	1	1	0	30	1
6	2	1	0/2	0	1	1	1	1	0	40	1
2	2	3	1/30	0	1	1	1	1	0	40	1
7	2	3	0/3	0	1	1	1	1	0	60	1
7	2	3	0/12	0	1	1	1	1	0	50	1
8	2	4	0/15	0	1	1	1	1	0	60	1
7	2	3	1c	0	1	1	1	0	0	70	1
7	2	3	0/5	0	1	1	1	1	0	30	1
7	2	5	0/9	0	1	1	1	1	0	80	1
7	4	3	0/18	0	1	1	1	1	0	30	1
8	2	4	3/11	0	1	1	1	1	0	50	1
8	2	4	0	0	1	1	1	1	0	80	1
8	2	1	0/2	0	1	1	1	1	0	60	1
2	2	4	0/9	1a	1	1	1	1	0	40	1
2	2	3	3/15	0	1	1	1	1	0	10	0
1	2	3	0/29	0	1	1	1	1	0	50	1
8	2	1	0/7	0	1	1	1	1	0	70	0
8	2	2	0/12	0	1	1	1	1	0	40	1
1	2	3	0/38	1a	1	1	1	1	0	30	1
8	2	4	4/6	0	1	1	1	1	0	1	1
8	2	2	0/13	0	1	1	1	1	0	60	1
7	2	2	0/23	0	0	1	1	0	0	70	1
8	2	4	1/9	0	1	1	1	1	0	70	1
7	2	3	0/4	0	1	1	1	1	0	40	1
8	2	4	0/3	0	1	1	1	1	0	10	1
6	2	5	0	0	1	1	1	1	0	50	0
7	2	3	0/15	0	1	1	1	1	0	60	1
7	2	4	4/10	0	1	1	1	1	0	70	1
8	2	1	0/10	0	1	1	1	1	0	1	0
2	2	3	1/19	0	1	1	1	1	0	40	1
7	2	3	0/19	0	1	1	1	1	0	60	1
1	2	5	0/21	0	1	1	1	1	0	90	0
7	2	5	3/15	0	1	0	0	1	0	30	1
2	2	3	0/2	1a	1	1	1	1	0	30	1
8	2	2	6/17	0	1	1	1	1	0	90	0
8	2	2	1c	0	1	1	1	1	0	90	1
2	2	3	0/31	0	1	1	1	1	0	60	0
7	2	2	1/10	0	1	1	1	1	0	90	1
7	2	2	0	0	1	1	1	1	0	40	1
7	2	1	0/1	0	1	1	1	1	0	60	1
1	2	5	2/26	1b	1	1	1	1	0	30	1
2	2	3	1/16	1a	1	1	1	1	0	60	1
4	1	3	3/9	0	1	1	1	1	0	50	1
3	2	3	0/29	0	1	1	1	1	0	50	1
5	2	3	0/11	1a	1	1	1	1	0	30	0
8	2	4	3/14	0	1	1	1	1	0	15	1
6	2	3	4/7	1a	1	1	1	1	0	40	1
8	2	2	0/13	0	1	0	1	1	0	90	1
8	2	3	0/23	1b	1	1	1	1	0	60	1
8	2	3	1/11	0	1	1	1	1	0	80	1
7	2	3	4/9	0	1	1	1	1	0	20	1
1	2	3	6/12	0	1	1	1	1	0	70	1
7	2	5	0/20	0	1	1	1	1	0	40	1
8	2	4	1/8	0	1	1	1	1	0	10	1
8	2	4	7/19	0	1	1	1	1	0	50	1
8	2	4	6/9	1a	1	1	1	1	0	60	1
1	2	3	6/12	1b	1	1	1	1	0	70	1
8	2	4	0/9	0	1	1	1	1	0	50	1
8	2	4	0	0	1	1	1	1	0	70	1
8	2	4	5/14	1b	1	1	1	1	0	70	1
8	2	2	0/11	0	1	1	1	1	0	60	0
2	2	1	0/10	0	1	1	1	1	0	80	1
8	2	3	0/9	0	1	1	1	1	0	30	1
7	2	3	5/12	1a	1	1	1	1	0	80	1
1	0	1	0/18	0	1	1	1	1	0	40	0
2	2	3	0/39	0	1	1	1	1	0	30	0
7	2	4	4/8	0	1	1	1	1	0	70	1
2	2	3	0/11	1a	1	1	1	1	0	80	1
8	2	5	0/4	0	1	1	1	1	0	20	0
2	2	3	0/19	0	1	0	0	1	0	60	1
8	2	4	0/3	0	1	1	1	1	0	50	1
8	2	4	0/5	0	1	1	1	1	0	10	0
8	2	4	1/11	0	1	1	1	1	0	70	1
8	2	4	0/24	0	1	1	1	1	0	80	1
8	2	4	1/13	0	1	1	1	1	0	30	1
1	4	3	0/22	0	1	1	1	1	0	90	0
8	2	4	0/16	0	1	1	1	1	0	90	0
1	4	3	0	1b	1	1	1	1	0	20	1
3	2	3	0/12	1a	1	1	1	1	0	40	1
7	2	3	0/15	0	1	1	1	1	0	40	1
7	2	3	1/10	0	1	1	1	1	1	15	1
8	2	2	0/5	0	1	1	1	1	0	70	1
1	2	3	0/7	0	1	1	1	1	0	60	1
8	2	2	0/4	0	1	1	1	1	0	50	1
8	2	4	0/15	0	1	1	1	1	0	80	1
8	2	2	0/1	0	1	1	1	1	0	60	1
8	2	4	0/6	0	1	1	1	1	0	50	1
7	2	3	0/8	0	1	1	1	1	0	80	1
8	2	5	5/6	0	1	1	1	1	0	40	1
4	4	4	3/13	1b	1	1	1	1	0	40	1
6	2	2	0/2	0	1	1	1	1	0	50	1
7	2	3	0/16	0	1	1	1	1	0	80	1
7	2	3	0/7	1a	1	1	1	1	0	70	0
3	2	3	4/36	0	1	1	1	1	0	30	1
8	2	4	1c	0	1	1	1	1	0	40	1
4	2	3	9/17	0	1	1	1	1	0	30	1
8	4	4	8/16	1a	1	1	1	1	0	40	0
3	2	3	0/26	0	1	1	1	1	0	50	1
7	2	3	1c	1b	1	1	1	1	0	80	1
7	2	3	0/4	0	1	1	1	1	0	30	0
2	2	3	2/26	0	1	1	1	1	0	50	1
4	2	3	0/7	1a	1	1	1	1	0	30	1
4	1	3	8/40	0	1	1	1	1	0	70	1
7	2	3	0/10	0	1	1	1	1	0	70	1
3	2	3	0/17	0	1	1	1	1	0	60	1
8	2	2	0/23	0	1	1	1	1	0	80	1
6	4	3	1c	0	1	1	1	1	0	70	1
8	2	5	2/3	0	1	1	1	1	0	70	1
7	2	3	1/8	1a	1	1	1	1	0	60	1
5	2	3	0/12	0	1	1	1	1	0	50	1
7	2	3	0/18	0	1	1	1	1	0	40	1
8	1	4	1c	0	1	1	1	1	0	70	1
7	2	3	2/18	0	1	1	1	1	0	60	1
8	2	5	0/9	0	1	1	1	1	0	50	0
6	2	3	4/16	0	1	1	1	1	0	60	1
2	2	4	2/7	1a	1	1	1	1	0	60	1
2	4	3	0/15	0	1	0	0	1	0	90	1
8	2	3	1c	0	1	1	1	1	0	5	1
7	2	3	2/16	0	1	1	1	1	0	80	1
7	2	2	0/5	0	1	1	1	1	0	80	1
7	2	4	0/22	0	1	1	1	1	0	40	1
8	2	4	0/12	0	1	1	1	1	0	70	0
3	2	3	0/6	0	1	1	1	1	0	80	0
6	2	3	0/15	0	1	1	1	1	0	70	1
8	2	2	0/17	0	1	1	1	1	0	80	1
8	2	3	0/2	0	1	1	1	1	0	3	1
8	2	2	5/14	0	1	1	1	1	0	90	0
7	2	3	1/18	0	1	1	1	1	0	80	1
7	4	3	0/22	0	1	1	1	1	0	60	1
3	2	3	0/4	0	0	1	1	0	0	40	0
6	2	3	1/5	0	1	1	1	1	0	30	1
7	2	3	0/15	1a	1	1	1	1	0	60	1
8	2	4	1/11	0	1	1	1	1	0	50	1
8	2	2	1c	0	1	1	1	1	0	10	1
8	2	4	0/7	0	1	1	1	1	0	2	1
7	2	3	3/14	1b	1	1	1	1	0	60	0
5	2	3	0/50	0	1	1	1	1	0	70	1
8	2	4	3/17	0	1	1	1	1	0	50	1
6	4	3	1/14	0	1	1	0	1	0	50	1
4	2	3	0/18	0	1	1	1	1	0	60	1
1	2	3	0/1	0	1	1	1	1	0	60	1
7	2	3	0/4	0	1	1	1	1	0	80	1
7	2	1	1/14	0	1	1	1	1	0	60	1
8	3	1	0/9	0	1	1	1	1	0	60	0
7	2	3	0/51	0	1	1	1	1	0	80	1
7	2	3	4/22	0	1	1	1	1	0	70	0
8	2	4	0/6	0	1	1	1	1	0	40	1
6	2	4	4/22	1a	1	1	1	1	0	50	1
3	2	3	0/17	0	1	1	1	1	0	50	1
7	5	4	21/21	1b	1	1	1	1	0	15	0
8	2	4	2/13	0	1	1	1	1	0	60	1
4	2	3	5/43	0	0	1	1	0	0	25	1
8	2	1	0	0	1	1	1	1	0	60	1
7	2	5	1c	1b	1	1	1	1	0	30	1
7	2	3	5/8	1a	1	1	1	1	0	60	1
8	2	2	0	0	1	1	1	1	0	80	1
8	2	2	0/11	0	1	1	1	1	0	60	0
8	2	4	0/6	0	1	1	1	1	0	50	1
8	2	4	2/9	1a	1	1	1	1	0	20	1
7	2	4	5/16	0	1	1	1	1	0	80	1
8	2	2	0	0	1	1	1	1	0	70	1
1	2	3	1/44	0	1	1	1	1	0	50	0
3	2	3	2/22	0	1	0	0	1	0	30	1
7	2	3	0/18	0	1	1	1	1	0	40	1
7	2	3	4/14	0	1	1	1	1	0	40	1
7	2	4	7/18	0	1	1	1	1	0	80	1
1	2	3	0/29	0	0	1	1	0	0	50	1
7	2	2	0/33	0	1	1	1	1	0	40	0
7	2	2	0/11	0	1	1	1	1	0	80	1
6	2	5	0	1b	1	1	1	1	0	10	1
7	2	3	1c	0	1	1	1	1	0	70	1
3	2	3	4/41	0	1	1	1	1	0	60	1
3	4	3	3/61	0	1	1	1	1	0	70	1
7	2	3	0/11	0	1	1	1	1	0	70	1
7	2	3	0/11	0	1	1	1	1	0	70	1
7	2	3	0/8	0	1	1	1	1	0	70	1
7	2	3	4/7	1a	1	1	1	1	0	80	1
8	2	3	1/14	0	1	1	1	1	0	70	1
3	2	3	1/29	0	1	1	1	1	0	30	1
4	2	3	0/14	0	1	1	1	1	0	70	1
8	2	4	0/7	0	1	1	1	1	0	60	0
8	2	3	0/7	0	1	1	1	1	0	80	0
8	2	2	0/8	0	1	1	1	1	0	0	0
8	2	4	0/6	0	1	1	1	1	0	70	1
2	1	5	0/3	0	1	1	1	1	0	60	1
8	2	4	0/12	0	1	1	1	1	0	70	0
8	2	4	0/3	0	1	1	1	1	0	60	0
8	2	2	0/13	0	1	1	1	1	0	40	0
8	2	5	0/12	0	1	1	1	1	0	60	1
8	2	2	0/5	0	1	1	1	1	0	60	0
4	2	3	0/32	0	1	1	1	1	0	40	1
7	2	3	0/14	0	1	1	1	1	0	70	0
8	2	3	13/13	1b	1	1	1	1	0	60	0
7	2	3	0/5	0	1	1	1	1	0	60	0
1	2	3	1c	1b	1	1	1	1	0	50	0
8	2	4	1/12	1a	1	1	1	1	0	70	1
8	2	2	0/6	0	1	1	1	1	0	80	0
7	2	3	0/10	0	1	1	1	1	0	80	1
7	2	3	0/10	0	1	1	0	1	0	70	1
4	2	3	2/8	0	1	1	1	1	0	70	1
3	2	3	3/22	0	1	1	1	1	0	70	1
8	2	2	0/6	0	1	1	1	1	0	40	1
8	2	4	1/19	0	1	1	1	1	0	30	1
2	4	3	0/25	0	1	0	0	1	0	60	0
1	2	3	0/4	1b	1	1	1	1	0	40	1
1	2	3	0/28	0	1	1	1	1	0	70	1
6	2	3	0/11	0	0	1	1	0	0	40	1
8	2	1	0	0	1	1	1	1	0	80	1
8	2	3	1c	0	1	1	1	1	0	10	1
1	2	3	1c	0	1	1	1	1	0	30	1
7	2	3	0/18	0	1	1	1	1	0	70	1
8	2	3	0/14	1a	1	1	1	1	0	30	1
7	2	3	0/6	0	1	1	1	1	0	80	0
1	2	2	1/13	0	1	1	1	1	0	60	1
4	1	3	1/25	0	0	1	1	0	0	70	1
1	2	3	0/26	0	1	1	1	1	0	70	1
4	2	3	2/22	0	1	1	1	1	0	50	1
7	2	3	3/9	0	1	1	1	1	0	80	1
7	2	3	5/9	1a	1	1	1	1	0	60	0
8	2	3	1/23	1a	1	1	1	1	0	80	1
7	2	3	5/12	0	1	1	1	1	0	80	1
8	2	2	0/5	0	1	1	1	1	0	80	1
7	2	4	0/17	0	1	1	1	1	0	60	1
5	2	3	0/9	0	1	1	1	1	0	40	1
8	2	4	0/14	0	1	1	1	1	0	70	1
8	2	2	2/4	0	1	1	1	1	0	30	1
7	2	4	0/7	1b	1	1	1	1	0	70	1
8	2	1	0/8	0	1	1	1	1	0	50	1
1	2	3	0/24	0	1	1	1	1	0	60	1
1	2	3	0/13	1a	1	1	1	1	0	80	1
8	2	4	0/20	0	1	1	1	1	0	80	1
6	2	3	0/11	1a	1	1	1	1	0	80	1
7	2	3	0/11	0	1	1	1	1	0	60	1
7	2	1	0/2	0	1	1	1	1	0	50	1
8	2	4	0/5	0	1	1	1	1	0	80	1
7	2	3	1c	0	1	1	1	1	0	60	1
8	2	2	0/24	0	0	1	1	0	0	70	1
4	2	3	0/9	0	1	1	1	1	0	90	1
1	2	4	1/21	0	1	1	0	1	0	90	1
8	2	1	0/4	0	1	1	1	1	0	40	1
8	2	1	0/11	0	1	1	1	1	0	60	1
8	2	2	0/3	0	1	1	1	1	0	60	1
5	2	3	2/14	1b	1	1	1	1	0	40	1
7	2	4	2/7	0	1	1	1	1	0	80	1
8	2	2	0/13	0	1	1	1	1	0	50	1
1	2	3	0/77	0	0	1	1	0	0	80	1
1	2	3	2/16	0	1	1	0	1	0	50	1
8	2	4	0/1	0	1	1	1	1	0	1	1
6	2	3	0/6	1b	1	1	1	1	0	40	0
8	2	4	0/1	0	1	1	1	1	0	1	1
7	2	3	0/8	0	1	1	1	1	0	20	1
8	2	4	0/18	0	1	1	1	1	0	5	1
7	2	3	0/15	0	1	1	1	1	0	80	1
7	2	2	0/15	0	1	1	1	1	0	30	1
8	2	1	0/11	0	1	1	1	1	0	90	1
1	2	3	2/23	0	1	1	1	1	0	70	1
7	4	4	9/10	1b	1	1	1	1	0	40	1
8	2	1	0/8	0	1	1	1	1	0	90	1
3	2	3	0/17	0	0	1	1	0	0	50	1
7	2	3	1c	0	1	1	1	1	0	60	1
8	2	4	1/22	1a	1	1	1	1	0	90	1
3	2	3	0/10	0	1	1	1	1	0	50	1
7	2	3	0/17	0	1	1	1	1	0	80	1
2	2	3	1/27	0	1	1	1	1	0	90	1
7	2	2	0/4	0	1	1	1	1	0	60	1
1	1	2	1/32	0	1	1	1	1	0	90	1
8	2	4	3/3	1a	1	1	1	1	0	2	1
7	2	3	0/24	0	1	1	1	1	0	30	1
7	2	4	1/6	1b	1	1	1	1	0	70	1
5	2	3	1c	0	1	1	1	1	0	50	1
2	1	3	0/36	0	1	1	1	0	0	70	1
8	2	4	0/6	0	1	1	1	1	0	30	1
8	2	3	0/4	0	1	1	1	1	0	5	1
5	2	3	0/16	0	1	1	1	1	0	60	1
8	2	4	0/10	0	1	1	1	1	0	70	1
7	2	2	0/7	0	1	1	1	1	0	60	1
7	2	3	0/6	0	1	1	1	1	0	40	1
8	2	3	0/10	0	1	1	1	1	0	20	1
5	2	3	0/11	1a	1	1	1	1	0	40	1
2	2	3	1/18	1b	1	1	1	1	0	40	1
8	2	3	0/8	0	1	1	1	1	1	40	1
1	2	3	0/15	0	1	1	1	1	0	40	1
7	2	4	12/12	1b	1	1	1	1	0	80	0
7	2	3	0/13	0	1	1	1	1	0	60	1
8	2	4	4/10	0	1	1	1	1	0	40	1
6	2	3	0/6	1a	1	1	1	1	0	70	1
1	2	3	0/15	0	1	1	1	1	0	60	1
7	2	3	1/16	0	1	1	1	1	0	50	1
2	2	3	0/8	0	1	1	1	1	0	80	1
2	2	3	1/12	1a	1	1	1	1	0	60	1
8	2	2	0/7	0	1	1	1	1	0	10	1
7	2	3	0/7	0	1	1	1	1	0	70	1
1	1	5	0/13	0	1	1	1	1	0	70	1
7	2	3	0/19	0	1	1	1	1	0	70	1
8	3	1	0/19	9	1	1	1	1	0	60	1
1	2	3	6/15	0	1	1	1	1	0	50	1
7	2	2	7/22	0	1	1	1	1	0	50	1
2	2	3	5/11	1a	1	1	1	1	0	80	1
7	2	2	0/17	0	1	1	1	1	0	40	1
8	2	2	0/19	0	1	1	1	1	0	1	1
7	2	1	0/13	0	1	1	1	1	0	80	1
8	2	3	1/2	0	1	1	1	1	0	30	1
2	4	3	0/10	0	1	1	1	1	0	70	1
8	2	1	0/6	0	1	1	1	1	0	70	1
5	2	4	0/14	0	1	1	1	1	0	80	1
3	4	3	2/14	0	1	0	0	1	0	60	1
2	2	3	0/8	0	1	1	0	1	0	50	1
2	2	3	0/20	0	1	1	0	1	0	70	1
7	2	3	0/11	0	1	1	1	1	0	70	1
8	2	2	0	0	1	1	1	1	0	50	1
7	2	3	5/15	0	1	1	1	1	0	60	1
2	2	3	2/15	0	1	1	1	1	0	80	1
7	2	3	0/4	0	1	1	1	1	0	70	1
8	2	3	1/14	0	1	1	1	1	0	60	1
1	2	3	0/35	0	1	1	1	1	0	60	1
8	2	2	0/13	0	1	1	1	1	0	50	1
2	2	3	1/18	1b	1	1	1	1	0	90	1
5	2	4	7/8	1b	1	1	1	1	0	70	1
8	2	2	2/3	0	1	1	1	1	0	5	1
2	2	3	0/33	0	1	1	1	1	0	40	1
2	2	3	0/41	0	1	1	1	1	0	40	1
4	2	2	0/23	0	1	1	1	1	0	60	1
2	2	3	0/50	0	1	1	1	1	0	30	1
2	2	3	0/11	0	1	1	1	1	0	30	1
8	2	4	3/15	0	1	1	1	1	0	50	1
8	2	3	0/15	0	1	1	1	1	0	60	1
7	2	3	0/13	0	1	1	1	1	0	70	1
7	2	2	0/3	0	1	1	1	1	0	80	1
7	2	3	5/13	1a	1	1	1	1	0	50	1
1	2	3	0	1b	1	1	1	1	0	30	1
8	2	3	0/4	1a	1	1	1	1	0	10	1
2	2	3	2/16	1a	1	1	1	1	0	40	1
8	2	3	3/8	1b	1	1	1	1	0	30	1
7	2	3	0/6	0	1	1	1	1	0	80	1
7	2	3	2/14	1b	1	1	1	1	0	50	1
5	2	4	2/19	0	1	1	1	1	0	70	1
8	2	4	1/9	0	1	1	1	1	0	70	1
7	3	1	0/13	0	1	1	1	1	0	50	1
8	2	4	0/13	0	1	1	1	1	0	60	1
8	2	3	0/9	0	1	1	1	1	0	50	1
8	2	4	0/18	0	1	1	0	1	0	50	1
7	2	2	0/2	0	1	1	1	1	0	70	1
7	2	4	1/24	0	1	1	1	1	0	70	1
7	2	3	0/10	0	1	1	1	1	0	70	1
8	2	4	1/7	0	1	1	1	1	0	70	1
7	2	3	0/11	0	1	1	1	1	0	60	1
6	1	3	0/5	0	1	1	1	1	0	80	1
7	2	3	0/6	0	1	1	1	1	0	70	1
8	2	2	0/1	0	1	1	1	1	0	60	1
8	2	3	0/2	0	1	1	1	1	0	70	1
6	2	3	0/22	0	0	1	1	0	0	80	1
7	2	3	0/6	0	1	1	1	1	0	60	1
7	2	3	1/23	0	1	1	1	1	0	60	1
8	2	4	2/8	0	1	1	1	1	0	5	1
7	2	4	3/4	0	1	1	1	1	0	80	1
2	2	3	1/30	0	0	1	1	0	0	60	1
8	2	1	0/1	0	1	1	1	1	0	90	1
7	2	3	0/17	0	1	1	1	1	0	60	1
5	2	4	0/11	0	1	1	1	1	0	70	1
8	2	2	0/9	0	1	1	1	1	0	90	1
4	2	2	0/6	0	0	1	1	0	0	80	1
8	2	4	4/19	0	1	1	1	1	0	40	1
7	2	3	0/7	0	1	1	1	1	0	80	1
8	2	4	0/19	0	1	1	1	1	0	60	1
3	1	5	0/15	0	0	1	2	0	0	70	1
2	4	3	2/15	0	0	1	1	0	0	60	1
7	2	2	0/12	0	1	1	1	1	0	70	1
7	2	4	1/12	1a	1	1	1	1	0	70	1
8	4	4	19/21	1a	1	1	1	1	0	1	1
8	2	4	5/7	1a	1	1	1	1	0	70	1
8	3	1	0/4	0	1	1	1	1	0	60	1
6	2	3	0/34	0	1	1	1	1	0	30	1
8	2	2	0/2	0	1	1	1	1	0	1	1
8	2	4	0/15	0	1	1	1	1	0	70	1
7	2	4	6/14	1b	1	1	1	1	0	70	1
7	2	3	0/6	0	1	1	1	1	0	50	1
7	5	3	1/1	1b	1	1	1	1	0	70	1
7	2	3	0/17	0	1	1	1	1	0	70	1
7	2	3	0/13	0	0	1	1	0	0	60	1
5	2	3	3/13	0	1	1	1	1	0	70	1
7	2	3	2/20	1a	1	1	1	1	0	70	1
4	2	3	0/15	0	1	1	1	1	0	40	1
3	2	3	1/16	0	1	1	1	1	0	60	1
8	2	4	1/9	0	1	1	1	1	0	20	1
5	2	3	0/6	0	0	1	1	0	0	70	1
8	2	4	3/7	0	1	1	1	1	0	60	1
3	2	3	1/16	0	1	1	1	1	0	70	1
7	4	3	0/8	0	1	1	0	1	0	70	1
3	4	3	3/10	1b	1	1	1	1	0	30	1
7	2	3	0/4	0	1	0	0	1	0	20	1
8	2	4	0/6	0	1	1	1	1	0	60	1
8	1	1	0/20	0	1	1	1	1	0	10	1
4	4	3	7/36	0	0	1	1	0	0	60	1
8	2	4	0/9	0	1	1	1	1	0	60	1
8	2	2	0/5	0	1	1	1	1	0	20	1
4	2	3	0/59	0	1	1	1	1	0	70	1
8	2	3	1/12	0	1	1	1	1	0	80	1
8	1	2	0/4	0	1	1	1	1	0	1	1
7	2	1	0/2	0	1	1	1	1	0	50	1
6	2	3	0/9	0	1	1	1	1	0	40	1
7	2	3	3/16	0	1	1	1	1	0	80	1
3	2	3	3/24	0	1	1	1	1	0	60	1
8	2	2	0/13	0	1	1	1	1	0	60	1
8	2	3	8/30	0	1	1	1	1	0	40	1
8	2	3	1/2	0	1	1	1	1	0	5	1
2	2	3	0/9	9	0	1	1	0	0	70	1
5	2	3	0/3	0	1	1	1	1	0	70	1
8	2	4	0/6	0	1	1	1	1	0	70	1
3	2	3	0/5	0	1	1	1	1	0	80	1
6	2	2	8/13	0	1	1	1	1	0	40	1
2	2	3	1/21	0	1	1	1	1	0	50	1
8	2	4	0/2	0	1	1	1	1	0	50	1
7	2	3	1/20	0	1	1	1	1	0	90	1
8	2	4	4/17	1a	1	1	1	1	0	60	1
8	2	3	0/6	0	1	1	1	1	0	40	1
7	1	3	19/21	1b	1	1	1	1	0	40	1
3	2	2	0/33	0	1	0	0	1	0	70	1
8	2	1	0/8	0	1	1	1	1	0	60	1
2	2	3	0/10	0	1	1	1	1	0	40	1
8	2	1	0	0	1	1	1	1	0	90	1
8	2	3	0/18	0	1	1	1	1	0	30	1
3	4	4	4/11	0	1	1	1	1	0	40	1
1	2	4	0/11	0	1	1	1	1	0	5	1
8	2	3	0/8	0	1	1	1	1	0	40	1
7	2	3	3/14	0	1	1	1	1	0	30	1
3	2	2	4/23	0	1	1	1	1	0	80	1
8	2	2	0/17	0	1	1	1	1	0	90	1
8	2	3	8/17	0	1	1	1	1	0	30	1
6	2	4	0/24	0	1	1	1	1	0	50	1
8	2	4	0/13	0	1	1	1	1	0	70	1
8	2	2	0/25	0	1	1	1	1	0	70	1
2	2	3	0/3	0	1	1	1	1	0	90	1
8	4	2	1/13	0	1	1	1	1	0	50	1
4	2	3	0/24	0	1	1	1	1	0	70	1
2	2	3	0/28	0	1	0	0	1	0	40	1
7	2	3	1/19	0	1	1	1	1	0	60	1
8	2	2	0/5	0	1	1	1	1	0	80	1
8	2	5	1/12	0	1	1	1	1	0	60	1
4	2	3	0/50	0	1	1	1	1	0	80	1
8	2	4	0/12	1b	1	1	1	1	0	5	1
2	4	3	1/41	0	1	1	0	0	0	40	1
2	2	3	2/44	0	1	1	1	1	0	80	1
7	2	3	0/7	0	1	1	1	1	0	60	1
3	2	3	0/25	0	1	0	0	1	0	40	1
7	1	4	11/12	1a	1	1	1	1	0	50	1
7	2	3	0/14	0	1	1	1	1	0	30	1
7	2	3	0/21	0	1	1	1	1	0	50	1
2	4	3	0/21	0	1	1	1	1	0	70	1
2	2	3	0/31	0	1	1	1	1	0	80	1
2	2	3	0/15	0	1	1	1	1	0	70	1
3	2	3	0/42	0	1	1	1	1	0	70	1
8	2	1	0/14	0	1	1	1	1	0	80	1
8	2	4	0/9	0	1	1	1	1	0	80	1
7	2	3	0	0	1	1	1	1	0	80	1
3	2	3	1/3	1b	1	1	1	1	0	80	1
7	2	3	5/11	0	1	1	1	1	0	70	1
7	2	3	1/7	0	1	1	1	1	0	50	1
8	2	3	0/5	0	1	1	1	1	0	40	1
8	2	2	0/11	0	1	1	1	1	0	80	1
7	2	3	0/13	0	1	1	1	1	0	50	1
7	2	3	0/14	0	1	1	1	1	0	70	1
2	2	3	0/28	0	1	1	1	1	0	60	1
7	2	3	2/12	0	1	1	1	1	0	40	1
7	2	4	3/15	0	1	1	1	1	0	70	1
7	2	3	1c	0	1	1	1	1	0	30	1
1	2	3	0/19	0	1	1	1	1	0	70	1
8	2	5	0	1b	1	1	1	1	0	70	1
2	2	3	0/18	0	1	1	1	1	0	90	1
7	2	3	3/4	1a	1	1	1	1	0	80	1
3	2	3	2/16	1b	1	1	1	1	0	80	1
7	2	3	1/21	0	1	1	1	1	0	30	1
6	4	3	0/5	0	1	1	1	1	0	40	1
7	2	3	0/37	0	1	1	1	1	0	40	1
7	2	3	0/25	0	1	1	1	1	0	70	1
6	2	3	0/11	0	1	1	1	1	1	90	1
7	2	3	1c	1b	1	1	1	1	0	50	1
7	2	3	0/9	0	1	1	1	1	0	40	1
7	2	3	0/31	0	1	1	1	1	0	70	1
2	2	3	0/42	0	1	1	1	1	0	50	1
8	2	3	0/10	0	1	1	1	1	0	80	1
7	2	2	0/27	0	1	1	1	1	0	80	1
2	2	3	3/32	1a	1	1	1	1	0	80	1
6	2	3	0/24	0	1	1	1	1	0	80	1
5	2	3	0/13	0	1	1	1	1	1	70	1
7	2	3	0/15	0	1	1	1	1	0	80	1
1	2	2	0/24	0	0	1	1	0	0	60	1
8	2	3	0/43	0	1	1	1	1	0	60	1
7	2	3	0/29	0	1	0	0	1	0	30	1
8	2	5	0/25	0	1	1	1	1	0	30	1
8	4	3	0/14	0	0	1	1	0	0	80	1
7	2	4	0/10	0	1	1	1	1	0	60	1
7	2	3	2/14	Ia	1	1	1	1	0	60	1
1	5	3	16/32	0	1	1	1	1	1	40	1
1	2	2	0/13	0	1	1	1	1	0	20	1
7	2	3	4/12	0	1	1	1	1	0	80	1
7	2	3	4/27	1a	1	1	1	1	0	70	1
8	2	3	3/14	1a	1	1	1	1	0	40	1
7	2	2	0/10	0	1	1	1	1	0	70	1
8	2	3	0/6	0	1	1	1	1	0	80	1
8	2	3	0/13	0	1	1	1	1	0	70	1
7	2	2	5/13	0	1	1	1	1	0	60	1
3	2	3	5/22	1b	1	1	1	1	0	60	1
8	2	3	1/4	0	1	1	1	1	0	10	1
8	2	4	0/20	0	1	1	1	1	0	80	1
8	2	3	1c	0	1	1	1	1	0	70	1
7	2	2	0/13	0	1	1	1	1	0	70	1
4	2	3	15/17	0	1	1	1	1	0	80	1
6	2	3	0/14	0	1	1	1	1	0	50	1
8	2	3	3/14	0	1	1	1	1	0	10	1
3	2	3	0/7	1a	1	1	1	1	0	30	1
8	2	3	1/4	0	1	1	1	1	0	70	1
7	2	3	9/17	0	1	1	1	1	0	90	1
8	2	4	5/16	0	1	1	1	1	0	80	1
7	2	3	0/8	0	1	1	1	1	0	50	1
2	2	3	3/24	0	1	1	1	1	0	40	1
8	2	2	0/12	0	1	1	1	1	0	70	1
8	2	3	0/9	0	1	1	1	1	0	5	1
8	2	4	0	0	1	1	1	1	0	40	1
7	2	3	4/15	0	1	1	1	1	0	50	1
8	2	4	3/13	0	1	1	1	1	0	70	1
8	2	3	2/4	1a	1	1	1	1	0	60	1
2	2	3	1/40	0	1	1	1	1	0	30	1
2	2	3	0/21	0	1	1	1	1	0	30	1
6	2	3	0/3	1b	1	1	1	1	0	50	1
2	2	3	3/28	0	1	1	1	1	0	60	1
7	2	3	1/8	0	1	1	1	1	0	60	1
7	2	3	31/32	0	1	1	1	1	0	70	1
6	2	3	2/22	0	1	1	1	1	0	60	1
3	2	3	0/25	0	1	1	1	1	0	80	1
2	2	3	2/17	0	1	1	1	1	0	30	1
8	2	2	0/7	1a	1	1	1	1	0	80	1
8	2	2	0/6	0	1	1	1	1	0	50	1
7	2	3	0/13	0	1	1	1	1	0	30	1
6	4	3	11/21	1b	1	1	1	1	0	20	1
8	2	3	9/18	0	1	1	1	1	0	60	1
7	2	3	9/10	0	1	1	1	1	0	40	1
2	2	3	3/20	1a	1	1	1	1	0	30	1
7	2	3	0/19	0	1	1	1	1	0	80	1
2	2	3	1/13	0	1	0	0	1	0	70	1
2	2	3	0/16	0	1	1	1	1	0	40	1
8	2	3	0/8	0	1	1	1	1	0	40	1
7	2	2	0/10	0	1	1	1	1	0	60	1
2	2	2	0/18	0	1	1	1	1	0	80	1
7	2	1	0/7	0	1	1	1	1	0	40	1
2	2	3	0/36	0	1	0	0	1	0	80	1
8	2	2	0/19	0	1	1	1	1	0	50	1
6	2	3	1/11	1a	1	1	1	1	0	50	1
7	2	3	0/4	1a	1	1	1	1	0	60	1
3	2	3	0/11	0	1	1	1	1	0	80	1
8	2	3	0/37	0	1	1	1	1	0	60	1
7	2	5	4/14	1b	1	1	1	1	0	30	1
8	2	3	0/11	0	1	1	1	1	0	50	1
6	2	3	0/10	0	1	1	1	1	0	60	1
6	2	3	2/20	0	0	1	1	0	0	20	1
8	2	3	0/3	0	1	1	1	1	0	40	1
2	2	3	0/41	0	1	1	1	1	0	70	1
8	2	4	0/4	0	1	1	1	1	0	30	1
8	2	4	0/9	0	1	1	1	1	0	80	1
2	2	3	0/18	0	1	1	1	1	0	40	1
7	2	3	0/8	0	1	1	1	1	0	40	1
6	2	3	0/12	0	1	1	1	1	0	70	1
7	5	3	0/7	1a	1	1	1	1	0	2	1
7	2	3	2/12	0	1	1	1	1	0	30	1
2	2	3	0/15	0	1	1	1	1	0	90	1
8	2	3	0/8	0	1	1	1	1	0	1	1
7	2	3	3/7	1a	1	1	1	1	0	40	1
6	2	3	0/18	0	1	1	1	1	0	400	1
6	2	3	0/9	0	1	1	1	1	0	60	1
8	2	1	0/4	0	1	1	1	1	0	80	1
7	2	3	5/9	0	1	1	1	1	0	80	1
2	2	3	0/23	0	1	0	0	1	0	60	1
7	2	3	2/27	0	1	1	1	1	0	70	1
8	2	4	0/34	0	1	1	1	1	0	60	1
7	2	3	1/5	0	1	1	1	1	0	40	1
8	2	4	0/13	0	1	1	1	1	0	80	1
2	2	3	10/13	1b	1	1	1	1	0	60	1
7	2	3	0/5	0	1	1	1	1	0	50	1
8	2	3	3/13	0	1	1	1	1	0	80	1
8	2	3	0/23	0	1	1	1	1	0	40	1
7	4	3	20/24	1a	1	1	1	1	0	80	1
7	2	2	0/1	0	1	1	1	1	0	30	1
8	2	3	0/18	0	1	1	1	1	0	50	1
6	2	3	0/7	0	1	1	1	1	0	70	1
8	2	3	1/11	0	1	1	1	1	0	40	1
8	1	4	0/14	0	1	1	1	1	0	801	0
7	2	3	0/12	0	1	1	1	1	0	20	1
8	2	3	1/13	1a	1	1	1	1	0	85	1
8	2	4	2/16	0	1	1	1	1	0	70	1
7	2	3	2/6	0	1	1	1	1	0	60	1
7	2	2	0/9	0	1	1	1	1	0	70	1
8	2	3	0/4	0	1	1	1	1	0	60	1
7	2	3	0/25	0	1	1	1	1	0	60	1
2	1	3	0/35	0	1	1	0	1	0	80	1
7	2	3	3/14	1a	1	1	1	1	0	60	1
3	2	3	0/32	1a	0	1	1	0	0	60	1
3	2	3	0/27	0	1	1	1	1	0	90	1
8	2	2	0/5	1a	1	1	1	1	0	801	1
8	2	2	0/1	0	1	0	1	1	0	0	1
7	2	3	2/9	1b	1	1	1	1	0	70	1
3	2	3	0/12	0	1	1	1	1	0	30	1
7	2	3	3/9	1a	1	1	1	1	0	80	1
8	2	3	1c	1a	1	1	1	1	0	40	1
8	2	3	4/18	1a	1	1	1	1	0	70	1
3	2	3	0/39	0	1	1	1	1	0	40	1
8	2	4	3/18	0	1	1	1	1	0	40	1
8	2	3	1c	0	1	1	1	1	0	40	1
7	2	2	3/35	0	1	1	1	1	0	70	1
8	2	3	0/9	0	1	1	1	1	0	30	1
8	2	2	0/1	0	1	1	1	1	0	2	1
7	2	4	2/22	0	1	1	1	1	0	40	1
8	2	4	0/7	0	1	1	1	1	0	60	1
8	2	2	0/13	0	1	1	1	1	0	70	1
8	2	4	1/11	0	1	1	1	1	0	80	1
8	2	1	0/13	0	1	1	1	1	0	20	1
7	2	2	0/8	0	1	1	1	1	0	60	1
7	2	3	10/23	0	1	1	1	1	0	30	1
8	2	3	1c	0	1	1	1	1	0	40	1
7	2	2	0/20	0	1	1	1	1	0	60	1
6	2	3	1/10	1a	1	1	1	1	0	60	1
1	2	3	0/26	0	1	1	1	1	0	70	1
7	2	3	11/13	1a	1	1	1	1	0	80	1
4	2	3	1c	0	0	1	1	0	0	70	1
8	2	4	0/18	0	1	1	1	1	0	85	1
7	2	3	0/22	1a	1	1	1	1	0	60	1
7	2	3	1/4	1a	1	1	1	1	0	60	1
8	2	3	0/16	0	1	1	1	1	0	90	1
8	2	4	3/8	1a	1	1	1	1	0	50	1
7	2	3	0/24	0	1	1	1	1	0	70	1
7	2	3	1c	0	1	1	1	1	0	70	1
7	2	3	1/1	0	1	1	1	1	0	70	1
8	2	3	0/3	0	1	1	1	1	0	40	1
2	2	3	5/27	0	1	1	1	1	0	65	1
5	2	3	9/24	1b	1	1	1	1	0	30	1
5	2	3	1/18	1a	1	1	1	1	0	70	1
2	2	3	3/12	0	1	1	1	1	0	40	1
8	2	3	0/7	0	1	1	1	1	0	30	1
8	2	3	0/14	0	1	1	1	1	0	80	1
2	2	3	1/14	0	1	1	1	1	0	70	1
8	2	3	1c	0	1	1	1	1	0	40	1
7	2	2	0/10	0	1	1	1	1	0	60	1
4	1	3	1/19	0	0	1	1	0	0	40	1
3	2	3	0/15	0	1	1	1	1	0	60	1
8	2	4	0	0	1	1	1	1	0	5	1
2	4	3	0/46	0	1	1	1	1	0	30	1
8	2	4	1/9	0	1	1	1	1	0	50	1
7	2	3	6/8	1a	1	1	1	1	0	30	1
7	2	3	0/11	0	1	1	1	1	0	30	1
8	2	2	0/16	0	1	1	1	1	0	30	1
7	2	3	15/16	0	1	1	1	1	0	60	1
1	2	3	1/26	0	0	1	1	0	0	40	1
4	2	3	0/20	1a	1	1	1	1	0	65	1
1	2	4	3/4	1a	1	1	1	1	0	30	1
7	2	3	0/9	0	1	1	1	1	0	50	1
6	2	3	0/5	0	1	1	1	1	0	30	1
3	2	3	2/14	0	1	1	1	1	0	60	1
7	2	3	0/12	0	1	1	1	1	0	30	1
7	2	3	0/14	0	1	1	1	1	0	80	1
8	2	3	1c	0	1	1	1	1	0	40	1
1	2	3	0/30	0	1	1	1	1	0	70	1
2	2	3	1c	0	1	1	1	1	0	80	1
2	2	3	0/25	1b	1	1	1	1	0	50	1
2	2	3	1/14	1b	1	1	1	1	0	50	1
7	2	3	1/16	0	1	1	1	1	0	70	1
7	2	3	0/28	0	0	1	1	0	0	80	1
8	2	2	0/26	0	1	1	1	1	0	30	1
8	2	2	0/29	0	1	1	1	1	0	20	1
8	2	3	0	0	1	1	1	1	0	5	1
2	2	2	0/9	0	0	1	1	0	0	70	1
8	2	3	0/18	0	1	1	1	1	0	60	1
1	2	3	3/25	0	1	1	1	1	0	60	1
8	2	3	0/6	0	1	1	1	1	0	60	1
7	2	2	4/9	0	1	1	1	1	0	60	1
7	2	3	1/13	1a	1	1	1	1	0	40	1
8	2	3	0/22	0	1	1	1	1	0	20	1
8	2	3	1c	0	1	1	1	1	0	40	1
8	4	4	0/14	0	1	1	1	1	0	60	1
1	4	3	1c	0	0	1	1	0	0	80	1
7	2	3	1c	1b	1	1	1	1	0	50	1
7	2	3	0/9	0	1	1	1	1	0	70	1
8	2	3	0/3	0	1	1	1	1	0	5	1
2	2	3	0/14	0	1	1	1	1	0	90	1
8	2	2	0/14	0	1	1	1	1	0	60	1
8	2	3	3/11	0	1	1	1	1	0	80	1
8	2	3	0/5	0	1	1	1	1	0	40	1
7	2	2	0/1	0	1	1	1	1	0	60	1
7	2	3	0/3	1a	1	1	1	1	0	80	1
8	2	3	2/8	0	1	1	1	1	0	80	1
2	2	1	0/19	0	1	0	1	1	0	60	1
8	2	4	0/16	0	1	1	1	1	0	60	1
8	2	3	0/21	0	1	1	1	1	0	50	1
7	2	2	4/19	1a	1	1	1	1	0	40	1
7	2	2	0/2	0	1	1	1	1	0	80	1
8	2	1	0/9	0	1	1	1	1	0	90	1
7	2	3	0/15	0	1	1	1	1	0	80	1
7	2	3	0/10	0	1	1	1	1	0	70	1
8	2	2	0/4	0	1	1	1	1	0	2	1
8	2	4	0/3	1a	1	1	1	1	0	60	1
8	0	1	0	0	1	1	1	1	0	80	1
8	2	4	0/8	0	1	1	1	1	0	60	1
4	2	3	0/18	0	1	1	1	1	0	70	1
8	2	4	1c	1a	1	1	1	1	0	90	1
7	2	3	0/11	0	1	1	1	1	0	60	1
7	2	3	1c	1a	1	1	1	1	0	40	1
7	2	4	0/9	0	1	1	1	1	0	80	1
7	2	3	0/4	0	1	1	1	1	0	40	1
6	2	3	1/16	1b	1	1	1	1	0	30	1
2	2	5	0/20	0	1	1	1	1	0	60	1
2	4	5	0/20	0	1	1	1	1	0	80	1
7	2	3	0/8	0	1	1	1	1	0	80	1
5	2	3	0/16	0	1	1	1	1	0	30	1
2	2	3	0/30	0	1	1	1	1	0	50	1
2	2	4	1/10	1a	1	1	1	1	0	30	1
8	2	4	19/23	1a	1	1	1	1	0	50	1
2	2	3	0/20	0	1	1	1	0	0	80	1
4	2	3	2/13	0	1	1	1	1	0	70	1
1	2	5	5/33	0	1	1	1	1	0	50	1
3	2	5	11/34	1a	1	1	1	1	0	30	1
2	1	3	0/28	0	1	0	0	1	0	70	1
7	2	3	0/9	1a	1	1	1	1	0	40	1
8	2	4	0/10	0	1	1	1	1	0	50	1
8	2	1	0/5	0	1	1	1	1	0	80	1
8	2	2	0/17	0	1	1	1	1	0	70	1
7	2	3	0/18	1a	1	1	1	1	0	85	1
8	2	4	1c	1a	1	1	1	1	0	80	1
6	2	5	2/14	1a	1	1	1	1	0	60	1
6	2	4	1c	0	1	1	1	1	0	60	1
2	2	5	6/27	1a	1	1	1	1	0	40	1
4	2	3	0/17	0	1	1	1	0	0	80	1
8	2	3	3/10	0	1	1	1	1	0	60	1
8	2	3	0/2	0	1	1	1	1	0	70	1
8	2	4	0/5	0	1	1	1	1	0	1	1
7	2	3	1/34	0	1	1	1	1	0	80	1
7	2	3	1/13	0	1	1	1	1	0	80	1
8	2	4	0/7	1a	1	0	1	1	0	20	1
3	2	5	4/30	1a	1	1	1	1	0	70	1
7	2	3	3/10	0	1	1	1	1	0	30	1
8	2	2	0/13	0	1	1	1	1	0	60	1
3	2	4	0/18	0	1	1	1	1	0	70	1
5	2	4	0/16	1a	1	1	1	1	0	30	1
8	2	1	0/21	0	1	1	1	1	0	70	1
8	2	4	0/6	1b	1	1	1	1	0	60	1
3	1	4	0/23	1b	1	1	1	1	0	40	1
7	2	3	0/18	1b	1	1	1	1	0	30	1
5	4	3	0/35	0	1	1	1	1	0	80	1
8	2	3	1/21	1a	1	1	1	1	0	70	1
5	2	3	1/13	0	1	1	1	1	0	50	1
8	2	4	1/4	1a	1	1	1	1	0	30	1
8	2	5	1/5	0	1	1	1	1	0	50	1
8	2	2	0/16	0	1	1	1	1	0	85	1
1	1	5	0/23	0	0	1	1	0	0	70	1
8	1	5	5/5	1a	1	1	1	1	0	70	1
7	2	3	1c	0	1	1	1	1	0	60	1
8	2	3	0/5	0	1	1	1	1	0	60	1
8	3	1	0/13	0	0	1	1	0	0	40	1
7	2	3	1/7	0	1	1	1	1	0	70	1
7	2	3	0/12	0	1	1	1	1	0	40	1
8	2	4	1c	0	1	1	1	1	0	70	1
5	2	3	0/14	1a	1	1	1	1	0	20	1
7	2	4	0/18	0	1	1	1	1	0	60	1
8	2	3	5/23	0	1	1	1	1	0	85	1
8	2	3	0/16	0	1	1	1	1	0	85	1
3	2	3	2/41	0	1	1	1	1	0	40	1
7	2	3	0/11	0	1	1	1	1	0	50	1
8	2	4	0/3	0	1	1	1	1	0	1	1
7	2	4	0/3	0	1	1	1	1	0	60	1
8	2	4	0/17	0	1	1	1	1	0	80	1
6	2	3	0/31	0	1	1	0	1	0	70	1
7	2	3	0/20	0	1	1	1	1	0	70	1
8	2	4	0/10	0	1	1	1	1	0	40	1
7	2	3	0/18	0	1	1	1	1	0	35	1
8	2	2	0/7	0	1	1	1	1	0	30	1
2	2	3	0/22	0	1	1	1	1	0	70	1
2	2	4	2/14	0	1	1	1	1	0	80	1
8	2	2	1c	1a	1	0	1	1	0	60	1
7	2	3	3/9	0	1	1	1	1	0	70	1
7	2	3	0/13	0	1	1	1	1	0	80	1
5	2	3	2/15	0	1	1	1	1	0	30	1
3	4	3	0/25	0	1	1	1	1	0	70	1
7	2	3	4/38	0	1	1	1	1	0	80	1
8	2	4	0/7	0	1	1	1	1	0	30	1
4	2	5	2/48	0	1	0	0	1	0	30	1
2	2	3	4/18	0	1	1	1	1	0	60	1
2	2	3	0/55	0	1	1	1	1	0	70	1
7	2	1	0/7	0	1	1	1	1	0	30	1
2	2	3	0/17	0	1	1	1	0	0	30	1
8	2	2	0/10	0	1	1	1	1	0	60	1
4	4	3	0/18	0	0	1	1	0	0	40	1
2	2	3	0/35	0	1	1	1	1	0	40	1
7	2	3	0/15	0	1	1	1	1	0	30	1
4	1	3	2/37	0	1	1	1	1	0	60	1
8	1	4	0	0	1	1	1	1	0	60	1
8	2	4	1/3	0	1	0	1	1	0	2	1
8	2	4	12/18	1A	1	1	1	1	0	60	1
4	2	3	1/19	0	1	1	1	1	0	60	1
4	2	3	1/9	1a	1	1	1	1	0	60	1
8	2	4	2/7	1a	1	1	1	1	0	50	1
2	2	3	1/23	0	1	1	1	1	0	30	1
8	2	4	1/5	0	1	1	1	1	0	70	1
2	2	3	0/13	0	1	1	1	1	0	10	1
7	2	4	0/7	1a	1	1	1	1	0	30	1
8	1	3	4/6	1b	1	1	1	1	0	35	1
8	2	2	0/10	0	1	1	1	1	0	80	1
2	2	3	1/29	0	1	1	1	1	0	80	1
6	2	3	2/17	0	1	1	1	1	0	30	1
2	2	3	1/12	0	1	1	1	1	0	30	1
7	2	3	2/10	1b	1	1	1	1	0	90	1
3	2	3	1/14	1a	1	1	1	1	0	40	1
7	2	2	0/10	0	1	1	1	1	0	50	1
8	2	4	3/14	0	1	1	1	1	0	40	1
4	2	3	0/6	1b	1	1	1	1	0	50	1
8	2	4	0/8	0	1	1	1	1	0	5	1
7	2	3	0/9	0	1	1	1	1	0	70	1
8	2	4	1/9	0	1	1	1	1	0	1	1
6	4	3	0/11	0	1	1	1	1	0	60	1
8	2	4	0/1	0	1	1	1	1	0	70	1
8	2	4	0/23	0	1	1	1	1	0	80	1
7	2	3	0/11	0	1	1	1	1	0	40	1
8	2	3	0/11	1a	1	1	1	1	0	70	1
8	2	4	0/9	0	1	1	1	1	0	80	1
7	2	3	0/14	0	1	1	1	1	0	60	1
8	2	2	0/13	0	1	1	0	1	0	90	1
7	2	3	2/11	0	1	1	1	1	0	40	1
8	2	4	0/9	0	1	1	1	1	0	15	1
7	2	3	1c	0	1	1	1	1	0	70	1
3	2	3	1/20	1a	1	1	1	1	0	60	1
8	2	4	0/11	0	1	1	1	1	0	70	1
8	2	3	1c	0	1	1	1	1	0	65	1
8	2	4	1c	1a	1	1	1	1	0	40	1
7	2	2	0/2	1a	1	1	1	1	0	40	1
8	2	4	1/6	0	1	1	1	1	0	40	1
7	4	3	1c	0	1	1	1	1	0	40	1
8	2	2	0/8	0	1	1	1	1	0	40	1
8	2	4	0/25	0	1	1	1	1	0	60	1
8	2	4	1/11	0	1	1	1	1	0	50	1
7	2	1	0	0	1	1	1	1	0	80	1
7	2	4	0/17	1b	1	1	1	1	0	40	1
8	2	4	0/15	0	1	1	1	1	0	40	1
1	2	3	6/8	0	1	0	0	1	0	80	1
8	2	4	0/14	0	1	1	1	1	0	90	1
8	2	2	1/10	0	1	1	1	1	0	85	1
8	2	4	12/23	1a	1	1	1	1	0	80	1
7	4	4	0/9	0	1	1	1	1	0	40	1
6	2	3	0/15	0	1	1	1	1	0	60	1
8	2	4	1/15	0	1	1	1	1	0	60	1
2	4	3	3/23	1a	1	1	1	1	0	80	1
8	2	2	0/2	0	1	1	1	1	0	5	1
3	2	3	1/19	0	1	1	1	1	0	60	1
8	2	4	4/7	0	1	1	1	1	0	20	1
8	2	4	0/1	0	1	1	1	1	0	1	1
3	2	3	0/35	0	1	1	1	1	0	30	1
8	2	1	0	0	1	1	1	1	0	50	1
8	2	3	0/16	0	1	1	1	1	0	50	1
7	1	3	7/16	0	1	0	0	1	0	60	1
8	2	4	0/3	0	1	1	1	1	0	15	1
7	2	3	0/13	0	1	1	1	1	0	70	1
7	2	3	0/19	1a	1	1	1	1	0	70	1
8	2	4	0/3	0	1	1	1	1	0	40	1
7	2	4	0/8	0	1	1	1	1	0	30	1
6	2	3	0/8	0	0	1	1	0	0	60	1
7	2	3	0/9	0	1	1	1	1	0	30	1
2	2	4	0/40	0	0	1	1	0	0	60	1
7	2	3	0/6	1a	1	1	1	1	0	60	1
2	2	3	0/11	0	0	1	1	0	0	70	1
3	2	4	0/32	0	1	1	1	1	0	80	1
8	2	4	0/11	0	1	1	1	1	0	60	1
8	2	2	0/35	0	1	1	1	1	0	80	1
8	2	4	0/17	0	1	1	1	1	0	80	1
8	2	2	0/12	0	1	1	1	1	0	40	1
8	2	2	0/5	0	1	1	1	1	0	60	1
7	2	5	1/23	0	1	1	1	1	0	60	1
6	2	3	0/1	1b	1	1	1	1	0	80	1
8	2	4	16/24	0	1	1	1	1	0	70	1
7	2	3	1/24	0	1	1	1	1	0	80	1
4	2	5	6/6	1b	1	1	1	1	0	80	1
3	5	5	1/22	1b	1	1	1	1	0	70	1
4	2	5	3/6	0	1	1	1	1	0	95	1
8	2	4	1/6	0	1	1	1	1	0	60	1
4	2	3	5/8	1b	1	1	1	1	0	40	1
3	2	5	15/28	0	1	1	1	1	0	60	1
7	2	4	1/16	0	1	1	1	1	0	80	1
5	2	5	0/2	0	0	1	1	0	0	70	1
7	2	3	1c	1b	1	1	1	1	0	60	1
7	2	3	0/4	0	1	1	1	1	0	80	1
8	1	3	2c	0	1	1	1	1	0	60	1
7	1	5	1/10	0	1	1	1	1	0	90	1
7	2	5	5/19	1a	1	1	1	1	0	60	1
8	2	4	1c	1a	1	1	1	1	0	80	1
8	3	4	1/7	0	1	1	1	1	0	60	2
8	2	4	3/6	1b	1	1	1	1	0	60	1
2	2	2	0/13	0	1	1	1	1	0	20	1
2	2	4	3/16	0	1	1	1	1	0	60	1
5	4	4	11/22	0	1	1	1	1	0	60	1
8	2	4	0/21	1a	1	1	1	1	0	70	1
2	1	3	1/14	0	1	1	1	1	0	80	1
8	2	1	0/1	0	1	1	1	1	0	60	1
2	2	5	4/10	1b	1	1	1	1	0	70	1
8	2	2	0/9	0	1	1	1	1	0	70	1
8	2	2	0/6	0	1	1	1	1	0	70	1
3	2	3	3/24	0	1	1	1	1	0	60	1
8	2	2	0/1	0	1	1	1	1	0	5	1
8	2	3	1/10	0	1	1	1	1	0	40	1
8	2	4	0/6	1a	1	1	1	1	0	30	1
8	2	2	0/30	0	1	1	1	1	0	70	1
6	2	3	4/14	0	1	1	1	1	0	60	1
7	2	3	9/28	0	1	1	1	1	0	70	1
7	2	3	0/19	0	1	1	1	1	0	70	1
8	2	2	0/12	0	1	1	1	1	0	60	1
8	2	2	0/4	0	1	1	1	1	0	80	1
8	2	1	0/7	0	1	1	1	1	0	50	1
8	2	4	0/2	0	1	1	1	1	0	50	1
2	2	3	2/17	0	1	1	1	1	0	50	1
8	2	3	0/11	0	1	0	0	1	0	80	1
3	2	3	0/36	0	1	1	1	1	0	30	1
2	2	5	2/18	1a	1	1	1	1	0	30	1
8	2	4	0/9	0	1	1	1	1	0	2	1
2	2	3	3/15	1b	1	1	1	1	0	40	1
7	2	3	7/21	0	1	1	1	1	0	30	1
8	2	4	0/13	0	1	1	1	1	0	70	1
8	2	4	1c	1a	1	1	1	1	0	20	1
8	2	4	1c	0	1	1	1	1	0	3	1
8	2	4	9/20	0	1	1	1	1	0	70	1
3	2	3	1/13	0	1	1	1	1	0	70	1
7	2	2	0/15	0	1	1	1	1	0	70	1
8	2	4	0/11	0	1	1	1	1	0	70	1
8	2	4	3/24	0	1	1	1	1	0	60	1
8	2	4	0/18	0	1	1	1	1	0	15	0
2	2	3	0/9	0	0	1	1	0	0	80	1
8	2	2	0/12	0	1	1	1	1	0	1	1
3	2	3	0/19	0	0	0	1	0	0	40	1
8	2	4	1c	1a	1	1	1	1	0	60	1
8	2	4	0/6	0	1	1	1	1	0	10	1
8	2	4	0/17	0	1	1	1	1	0	60	1
6	2	3	0/12	0	1	1	1	1	0	30	1
7	2	4	0/18	0	1	1	1	1	0	30	1
5	2	3	0/9	0	1	1	1	1	0	40	1
3	2	3	1/13	0	1	1	1	1	0	80	1
7	2	5	1c	0	1	1	1	1	0	70	1
8	2	2	0/13	0	1	1	1	1	0	60	1
4	2	3	3/7	1b	1	1	1	1	0	50	1
7	2	3	0/16	0	1	1	1	1	0	70	1
8	2	4	0/17	0	1	1	1	1	0	80	1
8	2	2	0/6	0	1	1	1	1	0	70	1
8	2	2	0/4	0	1	1	1	1	0	5	1
2	5	3	0/19	1b	1	1	1	1	0	60	1
8	2	2	0/6	0	1	1	1	1	0	60	1
7	2	1	0/4	0	1	1	1	1	0	80	1
2	2	3	0/13	0	1	1	1	0	0	60	1
4	2	3	1c	0	1	1	1	1	0	40	1
3	4	4	4/16	0	1	1	1	1	0	60	1
8	2	2	0/11	0	1	1	1	1	0	2	1
8	2	2	0/1	0	1	1	1	1	0	60	1
7	2	5	0/9	0	1	1	1	1	0	50	1
8	2	1	1/5	0	1	1	1	1	0	80	1
4	2	3	0/20	0	1	1	1	1	0	60	1
7	2	5	0/8	0	1	1	1	1	0	50	1
6	2	4	0/15	0	1	1	1	1	0	70	1
8	2	1	0/9	0	1	1	1	1	0	80	1
8	2	2	0/9	0	1	1	1	1	0	1	1
8	2	4	1/14	0	1	1	1	1	0	70	1
7	2	3	0/13	0	1	1	1	1	0	80	1
8	2	2	9/12	0	1	1	1	1	0	80	1
7	2	3	2/12	0	1	1	1	1	0	30	1
7	2	3	0/11	0	1	1	1	1	0	60	1
8	2	5	1/11	0	1	1	1	1	0	60	1
7	2	4	0/12	0	1	1	1	1	0	60	1
8	2	2	0/19	0	1	1	1	1	0	70	1
2	2	4	0/36	0	1	1	1	1	0	40	1
2	2	3	1/38	0	1	1	1	1	0	70	1
2	2	3	0/37	0	1	1	1	1	0	60	1
8	2	3	0/11	0	1	1	1	1	0	60	1
2	2	3	1c	1b	1	1	1	1	0	70	1
3	2	3	0/14	0	1	1	1	1	0	90	1
3	2	3	0/14	0	0	1	1	0	0	50	1
8	2	2	0/7	0	1	1	1	1	0	2	1
7	2	2	0/24	0	1	1	1	1	0	70	1
2	2	3	2/19	0	1	1	1	1	0	70	1
8	2	2	0/10	0	1	1	1	1	0	80	1
8	2	4	0/9	0	1	1	1	1	0	30	1
2	1	4	0/11	0	0	1	1	0	0	60	1
7	2	3	0/35	0	1	1	1	1	0	40	1
7	2	3	0/21	0	0	1	1	0	0	70	1
8	2	2	2/5	0	1	1	1	1	0	60	1
7	2	3	5/9	1b	1	1	1	1	0	70	1
7	4	4	0/11	0	1	1	1	1	0	50	1
4	2	3	1/17	0	1	1	1	1	0	40	1
2	2	3	2/13	0	1	1	1	1	0	80	1
7	2	2	0/14	0	1	1	1	1	0	60	1
7	2	3	0/13	0	1	1	1	1	0	80	1
8	2	4	0/28	0	1	1	1	1	0	70	1
3	4	3	0/14	0	1	1	1	1	0	10	1
7	1	3	15/18	0	1	0	0	1	1	40	1
8	2	4	1c	0	1	1	1	1	0	60	1
8	2	4	0/5	0	1	1	1	1	0	70	1
6	2	3	0/19	0	1	1	1	1	0	40	1
2	2	3	0/34	0	1	1	1	1	0	70	1
7	2	5	0	1b	1	1	1	1	0	45	1
77	2	3	0/12	0	1	1	1	1	0	40	1
8	2	3	0/9	0	1	1	1	1	0	30	1
3	4	4	0/13	1b	1	1	1	1	0	60	1
8	4	4	1/9	0	1	1	1	1	0	40	1
8	2	2	0/13	0	1	1	1	1	0	80	1
4	2	3	1/10	0	1	1	1	1	0	35	1
8	2	2	0/8	0	1	1	1	1	0	60	1
2	2	3	1/24	0	1	1	1	1	0	70	1
2	1	3	0/16	0	0	1	0	0	0	50	1
7	2	1	0/23	0	1	1	1	1	0	30	1
2	2	2	0/25	0	1	0	0	1	0	60	1
8	2	2	0/25	0	1	1	1	1	0	30	1
8	2	4	0	0	1	1	1	1	0	60	1
8	2	1	0/4	0	1	1	1	1	0	60	1
4	2	3	0/10	0	1	1	1	1	0	30	1
7	2	3	1/10	0	1	1	1	1	0	40	1
8	1	3	13/13	1b	1	1	1	1	0	40	1
7	2	3	4/8	1b	1	1	1	1	0	80	1
8	2	4	0/7	0	1	1	1	1	0	80	1
2	1	4	0/47	0	0	1	1	0	0	40	1
8	2	3	0/29	0	1	1	1	1	0	70	1
7	2	3	4/17	0	1	1	1	1	0	30	1
8	2	2	1/7	0	1	1	1	1	0	80	1
3	2	3	0/18	1a	1	1	1	1	0	70	1
8	2	4	0/12	0	1	1	1	1	0	40	1
8	2	4	0/6	0	1	1	1	1	0	80	1
7	2	3	1/13	0	1	1	1	1	0	60	1
2	2	5	0/39	0	1	1	1	1	0	70	1
4	2	4	0/11	0	1	1	1	1	0	80	1
8	2	4	0/3	0	1	1	1	1	0	1	1
2	2	5	1c	1b	1	1	1	1	0	30	1
2	2	3	2/17	0	1	0	0	1	0	70	1
8	2	2	0/20	0	1	1	1	1	0	80	1
5	2	5	0/6	1b	1	1	1	1	0	70	1
8	4	4	0/16	0	1	1	1	1	0	80	1
2	2	3	2/31	0	1	1	1	1	0	30	1
1	2	3	1/15	0	1	1	1	1	0	80	1
2	2	1	0/16	0	1	1	1	1	0	40	1
3	2	3	0/34	0	1	1	1	1	0	30	1
4	2	3	0/16	0	0	1	1	0	0	70	1
7	2	3	0/10	0	1	1	1	1	0	70	1
4	2	2	1c	0	0	1	1	0	0	60	1
8	2	4	0/16	0	1	1	1	1	0	50	1
8	2	1	0/21	0	1	1	1	1	0	50	1
7	2	3	0/24	0	1	1	1	1	0	50	1
8	2	2	0/12	0	1	1	1	1	0	80	1
3	2	4	3/18	0	1	1	1	1	0	80	1
8	2	2	1/5	1a	1	1	1	1	0	1	1
8	2	4	2/8	1	1	1	1	1	0	10	1
3	2	3	2/18	0	1	1	1	1	0	60	1
7	2	3	0/13	0	1	1	1	1	0	60	1
7	2	3	6/19	1b	1	1	1	1	0	70	1
8	2	5	0/5	0	1	1	1	1	0	80	1
8	2	4	1/6	0	1	1	1	1	0	1	1
8	2	4	0/2	0	1	1	1	1	0	5	1
7	2	3	0/11	0	1	1	1	1	0	40	1
8	2	5	5/16	1a	1	1	1	1	0	40	1
7	2	2	0/15	0	1	1	1	1	0	60	1
8	1	4	0/9	1a	1	1	1	1	0	70	1
7	2	5	1c	1b	1	1	1	1	0	60	1
8	2	2	0/17	0	1	1	1	1	0	90	1
8	2	2	0/14	0	1	1	1	1	0	60	1
8	2	2	0/3	0	1	1	1	1	0	50	1
2	2	3	0/29	0	1	1	1	1	0	70	1
7	2	3	0/11	1a	1	1	1	1	0	80	1
2	2	3	2/29	0	0	1	1	0	0	35	1
2	2	3	0/12	0	1	1	1	1	0	60	1
8	2	4	1/3	1a	1	1	1	1	0	50	1
7	2	3	1/20	1a	1	1	1	1	0	40	1
2	2	3	0/56	0	0	1	1	0	1	80	1
8	2	2	0/8	0	1	1	1	1	0	80	1
3	2	3	0/51	0	1	0	0	1	0	70	1
3	2	5	1/5	1a	1	1	1	1	0	80	1
8	1	4	1/5	1b	1	1	1	1	0	90	1
8	2	4	2/16	0	1	1	1	1	0	20	1
6	2	3	0/8	1a	1	1	1	1	0	50	1
7	4	3	2/16	0	1	1	1	1	0	70	1
3	2	5	0/8	1b	1	1	1	1	0	40	1
4	2	3	0/13	0	1	1	1	1	0	50	1
8	2	4	0/13	0	1	1	1	1	0	70	1
7	2	3	0/22	0	0	1	1	0	0	80	1
1	2	5	8/21	0	1	1	1	1	0	60	1
8	2	4	1/7	0	1	1	1	1	0	60	1
8	2	4	1/22	0	1	1	1	1	0	50	1
8	2	3	0/7	0	1	1	1	1	0	40	1
2	2	3	1c	1b	1	1	1	1	0	40	1
8	2	2	0/4	0	1	1	1	1	0	90	1
3	2	3	0/28	1a	1	1	1	1	0	20	1
8	2	3	1/16	0	1	1	1	1	0	3	1
8	2	4	1/15	0	1	1	1	1	0	80	1
6	2	3	0/10	1a	1	1	1	1	0	40	1
7	2	3	1/10	1a	1	1	1	1	0	60	1
8	2	2	0/4	0	1	1	1	1	0	50	1
7	2	3	0/7	0	1	1	1	1	0	70	1
7	2	2	0/13	0	1	1	1	1	0	60	1
7	2	3	0/15	0	1	1	1	1	0	40	1
8	2	4	3/9	0	1	0	1	0	0	5	1
3	2	2	0/19	0	1	1	1	1	0	60	1
7	2	3	1/23	0	1	1	1	1	0	60	1
8	2	2	0/4	0	1	1	1	1	0	65	1
8	2	4	1/2	1a	1	1	1	1	0	30	1
8	2	4	0/5	0	1	1	1	1	0	60	1
7	2	3	0/12	0	1	1	1	1	0	70	1
8	2	3	1c	0	1	1	1	1	0	60	1
7	2	2	0/10	0	1	1	1	1	0	70	1
6	2	3	6/10	1a	1	1	1	1	0	30	1
2	2	3	0/27	0	0	1	1	0	0	60	1
7	2	3	3/17	1a	1	1	1	1	0	60	1
7	2	4	1/14	0	1	1	1	1	0	70	1
6	2	3	4/14	0	1	1	1	1	0	85	1
8	2	2	0/8	0	1	1	1	1	0	20	1
7	2	3	0/16	0	1	1	1	1	0	80	1
2	2	2	0/13	0	0	1	1	0	0	60	1
8	3	2	0/12	0	1	1	1	1	0	70	1
8	2	1	0/14	0	1	1	1	1	0	80	1
7	2	5	0/4	1b	1	1	1	1	0	60	1
7	2	3	0/12	0	0	1	1	0	0	90	1
8	2	2	0/16	0	1	1	1	1	0	70	1
8	2	4	8/11	1a	1	1	1	1	0	80	1
8	2	5	0/8	1b	1	1	1	1	0	25	1
7	2	3	0/4	0	1	1	1	1	0	40	1
8	2	5	0/5	0	1	1	1	1	0	5	1
2	2	3	0/9	0	1	1	1	1	0	50	1
4	2	4	0/17	0	1	1	1	1	0	70	1
8	2	4	0/12	0	1	1	1	1	0	50	1
8	2	4	0/7	1a	1	1	1	1	0	1	1
8	2	4	0/12	0	1	0	1	1	0	3	1
4	2	4	0/21	0	1	1	1	1	0	40	1
2	2	3	2/23	0	1	1	1	1	0	70	1
2	2	3	1/19	0	1	1	1	1	0	80	1
7	2	3	1c	1b	1	1	1	1	0	70	1
7	2	3	1/15	0	1	1	1	1	0	70	1
0	2	3	4a	0	1	1	1	1	0	80	1
8	2	2	0/12	0	1	1	1	1	0	40	1
7	2	4	1/11	0	1	1	1	1	0	70	1
8	2	4	0/17	0	1	1	1	1	0	60	1
7	2	4	0/24	0	1	1	1	1	0	70	1
7	2	2	0/19	0	1	1	1	1	0	70	1
3	2	4	0/23	0	1	1	1	1	0	60	1
8	2	2	0/15	0	1	1	1	1	0	70	1
6	2	4	0/8	0	1	1	1	1	0	70	1
4	2	5	0/7	0	0	1	1	0	0	60	1
4	2	3	0/35	0	1	1	1	1	0	80	1
5	2	4	2/15	0	0	1	1	0	0	50	1
8	2	4	0/11	0	1	1	1	1	0	70	1
8	2	2	0/3	0	1	1	1	1	0	40	1
8	2	3	9/13	0	1	1	1	1	0	80	1
8	2	4	1c	0	1	1	1	1	0	60	1
8	2	2	0/3	0	1	1	1	1	0	3	1
7	2	3	1/21	0	1	1	1	1	0	70	1
7	2	3	0/12	0	1	1	1	1	0	60	1
8	2	2	0/6	0	1	1	1	1	0	90	0
8	2	4	0/3	0	1	1	1	1	0	30	1
2	2	3	0/14	1a	1	1	1	1	0	40	1
6	2	3	0/16	0	1	1	1	1	0	60	1
4	2	3	0/10	0	1	1	1	1	0	70	1
2	2	3	0/33	1a	1	1	1	1	0	40	1
3	4	3	0/16	0	0	1	1	0	0	80	1
7	2	3	1/23	0	1	1	1	1	0	60	1
2	1	5	0/29	0	1	1	1	1	0	50	1
3	4	3	1/22	0	1	1	1	1	0	60	1
7	2	2	0/28	0	1	1	1	1	0	40	1
7	2	4	0/22	0	1	1	1	1	0	60	1
3	2	3	4/12	0	1	1	1	1	0	60	1
7	2	1	8/15	0	1	1	1	1	0	90	1
2	2	3	0/33	0	1	1	1	1	0	90	1
7	2	3	0/18	0	1	1	1	1	0	70	1
3	2	3	1c	0	1	1	1	1	0	60	1
8	2	3	0/10	0	1	1	1	1	0	30	1
8	4	4	2/14	0	1	1	1	1	0	70	1
8	2	4	12/23	1b	1	1	1	1	0	10	1
8	2	4	0/14	1a	1	1	1	1	0	40	1
5	2	3	0/15	0	1	1	1	1	0	80	1
7	2	1	3/24	0	1	1	1	1	0	80	1
2	2	3	0/23	0	0	1	1	0	0	80	1
7	2	3	0/12	0	1	1	1	1	0	60	1
8	2	4	9/18	0	1	1	1	1	0	85	1
8	2	4	0/16	0	1	1	1	1	0	90	1
7	2	3	0/13	0	1	1	1	1	0	70	1
7	2	3	1/16	0	1	1	1	1	0	80	1
6	2	3	0/16	0	0	1	1	0	0	80	1
8	2	2	0/10	0	1	1	1	1	0	70	1
7	2	2	0/30	0	1	1	1	1	0	80	1
7	1	4	1/10	0	1	1	1	1	0	90	1
2	2	4	0	0	1	1	1	1	0	40	1
7	2	4	2	1	1	1	1	1	0	60	1
8	1	3	1	0	1	1	1	1	0	80	1
7	2	3	1	0	1	1	1	1	0	70	1
8	2	3	0	0	1	1	1	1	0	70	1
7	1	3	1	0	1	1	1	1	0	70	1
4	2	3	1	0	1	1	1	1	0	80	1
2	3	1	0	0	1	1	1	1	0	30	1
2	2	4	1	0	1	1	1	1	0	70	1
8	2	1	0	0	1	1	1	1	0	60	1
8	4	2	0		1	1	1	1	0	70	1
8	1	4	1	1	1	1	1	1	0	60	1
8	2	2	1	0	1	1	1	1	0	70	1
2	1	4	2	1	1	1	1	1	0	60	1
6	2	3	1	0	1	1	1	1	0	80	1
2	2	3	0	0	1	1	1	1	0	40	1
7	2	3	0	0	1	1	1	1	0	70	1
7	2	4	2	1	1	1	1	1	0	70	1
8	2	3	0	0	1	1	1	1	0	50	1
7	1	4	0	0	1	1	1	1	0	40	1
8	2	4	1	0	1	1	1	1	0	30	1
6	2	4	1	0	1	1	1	1	0	70	1
8	2	4	1	0	1	1	1	1	0	40	1
7	2	4	2	0	1	1	1	1	0	40	1
8	2	3	1	0	1	1	1	1	0
8	2	3	1	0	1	1	1	1	0	40	1
8	2	3	1	0	1	1	1	1	0	70	1
2	2 4	3	0	0	1	1	1	1	0	30	1
8	2	4	1	0	1	1	1	1	0	1	1
7	2	3	0	0	1	1	1	1	0	60	1
8	2	5	2	1	1	1	1	1	0	60	1
6	2	5	2	1	1	1	1	1	0	50	1
8	2	3	0	0	1	1	1	1	0	20	1
4	2	5	x	1	1	1	1	1	0	50	1
8	2	2	0	0	1	1	1	1	0	80	1
8	2	1	0	0	1	1	1	1	0	60	1
8	2	3	2	0	1	1	1	1	0	40	1
7	2	3	0	0	1	1	1	1	0	40	1
8	2	3	1	0	1	1	1	1	0	60	1
8	1	5	0	1	1	1	1	1	0	20	1
8	2	4	0	0	1	1	1	1	0	35	1
8	2	3	2	0	1	1	1	1	0	60	1
2	2	3	0	0	1	1	1	1	0	60	1
8	4	4	2	0	1	1	1	1	0	80	1
2	1	5	1	1	1	1	1	1	0	15	1
8	2	2	0	0	1	1	1	1	0	70	1
1	4	3	2	1	1	1	1	1	0	40	1
8	2	5	0	0	1	1	1	1	0	80	1
8	1	3	2	0	1	1	1	1	0	35	1
6	2	3	0	0	1	1	1	1	0	70	1
7	2	3	0	0	1	0	1	1	0	60	1
8	2	2	0	0	1	1	1	1	0	80	1
7	2	3	0	0	1	1	1	1	0	40	1
8	2	3	0	0	1	1	1	1	0	70	1
8	2	2	0	0	1	1	0	1	0	70	1
8	4 5	3	2	0	1	1	1	1	0	60	1
8	2	2	0	0	1	1	1	1	0	60	1
7	2	3	0	0	1	1	1	1	0	60	1
6	2	4	x	1	1	1	1	1	0	40	1
7	1 2	4	1	0	1	1	1	1	0	60	1
8	1 2	4	0	0	1	1	1	1	0	60	1
7	2	2	0	0	1	1	1	1	0	80	1
8	2	4	2	0	1	1	1	1	0	5	1
7	2	3	0	0	1	1	1	1	0	40	1
6	3	3	0	0	1	1	1	1	0	50	1
8	2	4	1	0	1	1	1	1	0	20	1
7	2	2	0	0	1	1	1	1	0	40	1
8	2	1	0	0	1	1	1	1	0	60	1
8	2	4	0	0	1	1	1	1	0	40	1
8	1 2	3	2	1	1	1	1	1	0	80	1
8	2	1	0	0	1	1	1	1	0	30	1
7	1	3	0	0	1	1	1	1	0	40	1
7	2	3	0	0	1	1	1	1	0	60	1
6	2	3	0	0	1	1	1	1	0	60	1
7	2	3	N	0	1	1	1	1	0	50	1
8	1 2	4	0	0	1	1	1	1	0	30	1
7	2	4	1	1	1	1	1	1	0	40	1
2	2	3	0	0	1	1	1	1	0	40	1
8	3	4	0	0	1	1	1	1	0	60	1
8	2	3	0	0	1	1	1	1	0	60	1
2	2	4	2	1	1	1	1	1	0	30	1
8	1 2	3	0	1	1	1	1	1	0	50	1
7	2	3	2	0	1	1	1	1	0	50	1
8	2	2	0	0	1	1	1	1	0	60	1
8	1	2	0	0	1	1	1	1	0	2	1
7	2	3	0	0	1	1	1	1	0	65	1
6	2	3	1	1	1	1	1	1	0	30	1
6	2	3	1	0	1	1	1	1	0	30	1
6	1 2	3	1	1	1	1	1	1	0	70	1
7	2	4	0	0	1	1	1	1	0	60	1
7	2	3	0	0	1	1	1	1	0	30	1
7	2	3	0	0	1	1	1	1	0	80	1
7	2	3	2	0	1	1	1	1	0	70	1
8	2	3	0	0	1	1	1	1	0	20	1
7	2	3	1	0	1	1	1	1	0	60	1
6	2	3	0	0	1	1	0	1	0	80	1
2	2 5	4	1	0	0	1	1	1	0	60	1
1	2	3	0	0	1	0	0	1	0	70	1
2	1 2	3	1	0	1	1	1	1	0	70	1
8	2	3	2	0	1	1	1	1		60	0
8	1 2	3	0	0	1	1	1	1	0	30	1
4	2	3	0	0	1	1	1	1	0	80	1
2	1 2 4	3	1	0	0	1	1	0	0	80	1
2	1 2	3	0	0	1	1	1	1	0	80	1
7	1	3	2	1	1	1	1	1	0	70	1
4	2	2	0	0	1	1	1	1	0	40	1
8	2	3	0	0	1	1	1	1	0	1	1
7	2	4	0	0	1	1	1	1	0	70	1
6	2	3	0	1	1	1	1	1	0	70	1
[truncated: 606 more rows]
